# Supplementary material for: A Novel Network Approach to Capture Cognition and Affect: COVID-19 Experiences in Canada and Germany
Source: Frontiers journal article supplement (doi:10.3389/fpsyg.2021.663627), 2021-06-11

## Electronic Supplementary Material

**Table 1**

*General Linear Regression Model (GLM) with Robust Confidence Intervals in Combined Sample*

| Variable              | Model 0             | Model 1             | Model 2             | Model 3              |
|-----------------------|---------------------|---------------------|---------------------|----------------------|
| Average Valence       | -0.217**<br>(0.088) | -0.281**<br>(0.091) | -0.231**<br>(0.084) | -0.151***<br>(0.012) |
| Central Node Valence  |                     |                     |                     |                      |
| Centrality            | 0.166***<br>(0.10)  | 0.078***<br>(0.006) |                     | 0.093***<br>(0.012)  |
| Density               | -0.174**<br>(0.058) | -0.159**<br>(0.070) |                     | -0.217***<br>(0.059) |
| Diameter              |                     |                     | -0.104†<br>(0.058)  |                      |
| Number Nodes          |                     |                     | 0.204***<br>(0.009) |                      |
| Number Links          |                     |                     |                     |                      |
| Number Dashed         |                     |                     |                     |                      |
| Number Solid          |                     |                     |                     |                      |
| Percentage Ambivalent |                     |                     |                     |                      |
| Percentage Negative   | -0.120<br>(0.078)   | -0.165**<br>(0.078) | -0.114<br>(0.072)   |                      |
| Percentage Neutral    |                     |                     |                     |                      |
| Percentage Positive   |                     |                     |                     |                      |
| Triadic Closure       |                     |                     |                     | 0.109**<br>(0.055)   |
| Age                   |                     |                     | -0.054**<br>(0.024) | -0.048**<br>(0.021)  |
| Education             |                     |                     | -0.017<br>(0.026)   | -0.002**<br>(0.021)  |
| Gender                |                     |                     |                     |                      |
| Female                |                     |                     | -0.360**            | -0.283               |

|                    |                  |                      |                      |                      |
|--------------------|------------------|----------------------|----------------------|----------------------|
|                    |                  |                      | (0.135)              | (0.181)              |
| Non-binary         |                  |                      | -1.084***<br>(0.272) | -1.391**<br>(0.508)  |
| Pref Not Say       |                  |                      | 1.503***<br>(0.255)  | 1.478***<br>(0.226)  |
| Country            |                  | -0.654***<br>(0.028) | -0.652***<br>(0.030) | -0.634***<br>(0.048) |
| Need for Affect    |                  |                      |                      | 0.030<br>(0.099)     |
| Need for Structure |                  |                      |                      | 0.209***<br>(0.025)  |
| constant           | 0.000<br>(0.303) | 0.339<br>(0.014)     | 0.800<br>(0.146)     | 0.649<br>(0.351)     |
| N                  | 193              | 193                  | 193                  | 193                  |
| Residual <i>df</i> | 192              | 192                  | 192                  | 192                  |
| Scale parameter    | 0.987            | 0.890                | 0.855                | 0.821                |
| Residual D         | 0.967            | 0.867                | 0.810                | 0.770                |
| AIC                | 2.809            | 2.700                | 2.633                | 2.581                |

*Note.* Correlation between network measures and a standardized measure of the perceived threat of coronavirus in combined Canadian and German samples.

†*p* < 0.100. \*\**p* < 0.050. \*\*\**p* < 0.001.

**Table 2***General Linear Regression Model (GLM) with Robust Confidence Intervals in Separated Samples*

| Variable               | Model 1<br>Canada   | Model 1<br>Germany | Model 2<br>Canada   | Model 2<br>Germany | Model 3<br>Canada   | Model 3<br>Germany |
|------------------------|---------------------|--------------------|---------------------|--------------------|---------------------|--------------------|
| Average Valence        | -0.418**<br>(0.132) |                    | -0.399**<br>(0.139) |                    |                     |                    |
| Central Node Valence   |                     |                    |                     |                    |                     |                    |
| Centrality             | -0.151<br>(0.122)   |                    |                     |                    |                     |                    |
| Density <sub>c</sub>   |                     | 1.102†<br>(0.448)  |                     | 0.332†<br>(0.193)  |                     | 0.342†<br>(0.192)  |
| Diameter               | -0.326**<br>(0.127) |                    | -0.223†<br>(0.117)  |                    | 0.188<br>(0.119)    |                    |
| Number Nodes           | 0.649**<br>(0.225)  | 1.102**<br>(0.448) | -<br>(0.303)        | 0.444**<br>(0.177) | -<br>(0.316)        | 0.429**<br>(0.168) |
| Number Links           | -0.490**<br>(0.225) |                    | 1.092**<br>(0.275)  |                    | 0.931**<br>(0.080)  |                    |
| Number Dashed          |                     |                    |                     |                    |                     |                    |
| Number Solid           |                     |                    |                     |                    |                     |                    |
| Percentage Ambivalence |                     |                    |                     |                    |                     |                    |
| Percentage Negative    | -0.292**<br>(0.123) |                    | -0.295**<br>(0.128) |                    | -0.097<br>(0.080)   |                    |
| Percentage Neutral     |                     |                    |                     |                    |                     |                    |
| Percentage Positive    |                     |                    |                     |                    | -0.259**<br>(0.091) |                    |
| Triadic Closure        |                     |                    | 0.211†<br>(0.116)   |                    | 0.185<br>(0.115)    |                    |
| Age                    |                     |                    | -0.111†<br>(0.067)  | -0.099<br>(0.126)  | -0.101<br>(0.063)   | -0.064<br>(0.132)  |
| Education              |                     |                    | -0.046              | 0.001              | -0.046              | 0.087              |

|                    |                  |                   |                          |                    |                          |                     |
|--------------------|------------------|-------------------|--------------------------|--------------------|--------------------------|---------------------|
|                    |                  |                   | (0.060)                  | (0.160)            | (0.059)                  | (0.144)             |
| Gender             |                  |                   |                          |                    |                          |                     |
|                    | Female           |                   | -0.415**<br>(0.171)      | -0.239<br>(0.219)  | -0.340**<br>(0.168)      | -0.099<br>(0.220)   |
|                    | Non-binary       |                   | -<br>1.843***<br>(0.338) | -0.763†<br>(0.398) | -<br>2.083***<br>(0.415) | -0.879**<br>(0.385) |
|                    | Pref Not Say     |                   | 1.821***<br>(0.343)      |                    | 1.752***<br>(0.359)      |                     |
| Need for Affect    |                  |                   |                          |                    | 0.163†<br>(0.095)        | -0.070<br>(0.094)   |
| Need for Structure |                  |                   |                          |                    | 0.160†<br>(0.091)        | 0.242**<br>(0.093)  |
| constant           | 0.371<br>(0.090) | -0.333<br>(0.098) | 1.165<br>(0.453)         | 0.079<br>(1.063)   | 1.102<br>(0.448)         | -0.593<br>(0.971)   |
| N                  | 93               | 100               | 93                       | 100                | 93                       | 100                 |
| Residual <i>df</i> | 86               | 97                | 83                       | 94                 | 81                       | 92                  |
| Scale parameter    | 0.754            | 0.953             | 0.671                    | 0.968              | 0.654                    | 0.920               |
| Residual D         | 0.754            | 0.953             | 0.655                    | 0.957              | 0.638                    | 0.910               |
| AIC                | 2.628            | 2.819             | 2.516                    | 2.853              | 2.508                    | 2.820               |

*Note.* Correlation between network measures and a standardized measure of the perceived threat of coronavirus in combined Canadian and German samples.

†*p* < 0.100. \*\**p* < 0.050. \*\*\**p* < 0.001.

**Table 3**

*General Linear Statistical Model (GLM): Interaction between Emotional and Latent Network and the Standardized Measure of the Perceived Threat of Coronavirus. Combined Sample*

| Variable                        | Coefficient | SD    | Z        | P>z       | 95% CI           |
|---------------------------------|-------------|-------|----------|-----------|------------------|
| Average Valence                 | -0.228      | 0.161 | -1.410   | 0.158     | [-0.544, 0.089]  |
| Centrality                      | 0.674       | 0.080 | 8.380    | 0.0001*** | [0.516, 0.831]   |
| Central Node Value              | 0.043       | 0.017 | 2.560    | 0.010**   | [0.010, 0.076]   |
| Density Log                     | -0.418      | 0.151 | -2.760   | 0.006**   | [-0.715, -0.122] |
| Number Nodes Log                | -0.354      | 0.012 | -28.690  | 0.0001*** | [-0.378, -0.329] |
| Number Links Log                | 0.321       | 0.189 | 1.700    | 0.090†    | [-0.049, 0.691]  |
| Percentage Negative             | -0.131      | 0.080 | -1.630   | 0.103     | [-0.289, 0.026]  |
| Percentage Ambivalent           | -0.015      | 0.001 | -14.280  | 0.0001*** | [-0.017, -0.013] |
| Centrality # Central Node Value | 0.234       | 0.024 | 9.550    | 0.0001*** | [0.186, 0.282]   |
| Density# Central Node Value     | 0.086       | 0.044 | 1.950    | 0.051†    | [0.000, 0.172]   |
| Country                         | -0.674      | 0.005 | -132.820 | 0.000     | [-0.684, -0.664] |
| constant                        | -0.016      | 0.051 | -0.310   | 0.753     | [-0.115, 0.083]  |
| N                               |             |       |          |           | 193              |
| Residual <i>df</i>              |             |       |          |           | 192              |
| Scale P                         |             |       |          |           | 0.842            |
| Residual D                      |             |       |          |           | 0.794            |
| AIC                             |             |       |          |           | 2.613            |

*Note.* †*p* < 0.100. \*\**p* < 0.050. \*\*\**p* < 0.001.

**Table 4**

*General Linear Statistical Model: Interaction between Emotional and Latent Network and the Standardized Measure of the Perceived Threat of Coronavirus. Canadian Sample*

| Variable                         | Coefficient | SD    | Z      | P>z       | 95% CI           |
|----------------------------------|-------------|-------|--------|-----------|------------------|
| Average Valence                  | -0.371      | 0.118 | -3.140 | 0.002**   | [-0.603, -0.139] |
| Diameter                         | -0.198      | 0.098 | -2.030 | 0.042**   | [-0.390, -0.007] |
| Number Links                     | -0.865      | 0.282 | -3.070 | 0.002**   | [-1.417, -0.312] |
| Number Solid                     | 0.364       | 0.178 | 2.050  | 0.040**   | [0.016, 0.712]   |
| Number Nodes                     | 0.823       | 0.201 | 4.090  | 0.0001*** | [0.428, 1.217]   |
| Percentage Negative              | -0.219      | 0.110 | -1.980 | 0.048**   | [-0.435, -0.002] |
| Central Node Value               | 0.102       | 0.100 | 1.020  | 0.307     | [-0.094, 0.299]  |
| Number Nodes#Percentage Negative | -0.269      | 0.092 | -2.920 | 0.004**   | [-0.451, -0.088] |
| Number Nodes# Central Node Value | -0.337      | 0.088 | -3.820 | 0.0001*** | [-0.510, -0.164] |
| constant                         | 0.351       | 0.087 | 4.030  | 0.0001    | [0.180, 0.521]   |
| N                                |             |       |        |           | 93               |
| Residual <i>df</i>               |             |       |        |           | 83               |
| Scale P                          |             |       |        |           | 0.662            |
| Residual D                       |             |       |        |           | 0.662            |
| AIC                              |             |       |        |           | 2.526            |

Note. †p < 0.100. \*\*p < 0.050. \*\*\*p < 0.001.

**Table 5**

*General Linear Statistical Model: Interaction between Emotional and Latent Network and the Standardized Measure of the Perceived Threat of Coronavirus. German Sample*

| Variable                            | Coefficient | SD    | Z      | P>z       | 95% CI           |
|-------------------------------------|-------------|-------|--------|-----------|------------------|
| Density                             | 0.388       | 0.250 | 1.550  | 0.121     | [-0.103, 0.878]  |
| Number Nodes                        | 0.566       | 0.221 | 2.560  | 0.010**   | [0.133, 0.998]   |
| Triadic Closure                     | -0.044      | 0.120 | -0.360 | 0.717     | [-0.279, 0.192]  |
| Central Node Value                  | 0.100       | 0.099 | 1.000  | 0.315     | [-0.095, 0.294]  |
| Density Log# Central Node Value     | 0.793       | 0.255 | 3.110  | 0.002**   | [0.293, 1.293]   |
| Number Nodes Log#Central Node Value | 0.495       | 0.229 | 2.160  | 0.031**   | [0.046, 0.944]   |
| Triadic Closure#Central Node Value  | -0.530      | 0.120 | -4.430 | 0.0001*** | [-0.765, -0.296] |
| constant                            | -0.341      | 0.089 | -3.820 | 0.0001    | [-0.516, -0.166] |
| N                                   |             |       |        |           | 100              |
| Residual <i>df</i>                  |             |       |        |           | 92               |
| Scale P                             |             |       |        |           | 0.881            |
| Residual D                          |             |       |        |           | 0.881            |
| AIC                                 |             |       |        |           | 2.788            |

*Note.* †p < 0.100. \*\*p < 0.050. \*\*\*p < 0.001.

## Summary of Network Measures

**Table 6**

*Full summary of network measures*

| Measure                      | Description                                                                                                                                                                                                                                                                            | Scale |
|------------------------------|----------------------------------------------------------------------------------------------------------------------------------------------------------------------------------------------------------------------------------------------------------------------------------------|-------|
| Emotional Network Properties |                                                                                                                                                                                                                                                                                        |       |
| Average Valence              | Overall emotional value of a CAM based on the sum normalized valence of the individual nodes. Neutral and ambivalent nodes are scored as zero.                                                                                                                                         | -3-3  |
| Percentage Ambivalent        | Percentage of nodes in a CAM that are ambivalent.                                                                                                                                                                                                                                      | 0-1   |
| Percentage Negative          | Percentage of nodes in a CAM that are negative.                                                                                                                                                                                                                                        | 0-1   |
| Percentage Neutral           | Percentage of nodes in a CAM that are neutral.                                                                                                                                                                                                                                         | 0-1   |
| Percentage Positive          | Percentage of nodes in a CAM that are positive.                                                                                                                                                                                                                                        | 0-1   |
| Central Node Valence         | Emotional value of each CAMs central node. 7-point negative to positive scale, neutral and ambivalent are scored as the midpoint.                                                                                                                                                      | 1-7   |
| Latent Network Properties    |                                                                                                                                                                                                                                                                                        |       |
| Centrality                   | Measure of degree centrality, defined here as the number of links (solid and dashed links and arrows) on a node normalized by the total number of possible links. If a CAM contains several central nodes (equivalent central nodes) then it shows the grouping of important concepts. |       |
| Density                      | The number of links a CAM has, divided by the total possible links a CAM could have.                                                                                                                                                                                                   | 0-1   |
| Diameter                     | Maximum distance from one node to another - longest path in the graph.                                                                                                                                                                                                                 | 0-8   |
| Number of Nodes              | Total number of nodes.                                                                                                                                                                                                                                                                 | 3-34  |
| Number of Links              | Total number of links.                                                                                                                                                                                                                                                                 | 3-40  |
| Number of Supporting Links   | Total number of supporting links (solid links).                                                                                                                                                                                                                                        | 0-40  |



|                               |                                                                                                                           |      |
|-------------------------------|---------------------------------------------------------------------------------------------------------------------------|------|
| Number of Contradicting Links | Total number of contradicting links (dashed links).                                                                       | 0-18 |
| Triadic Closure               | Total number of triangles (three nodes connected with each other by links) divided by total number of possible triangles. | 0-1  |

---

### Exploratory Question Rational

#### Exploratory Questions:

1. Do the emotional network properties of CAMs (e.g., average valence and valence of central node) predict the perceived threat of the coronavirus?
2. Do the latent network properties of CAMs (e.g., density, diameter, closure) predict the perceived threat of the coronavirus?
3. If so, to what extent are the network properties that predict the perceived threat of the coronavirus consistent across samples?

The rationale for the first exploratory question is based on the fact that the coronavirus pandemic is having negative consequences for billions of people. A structural feature of CAMs is that individuals can indicate the emotional valence of each concept they include in their network. Two expectations that follow from these negative consequences are that: 1) individuals whose lives have been disproportionately negatively affected by the coronavirus should be both more likely to associate it with negative concepts and experiences, and; 2) individuals who have had more negative experiences should be more likely to perceive the coronavirus as threatening. Consequently, if CAMs do meaningfully represent individuals' thoughts and experiences with an event (the coronavirus pandemic), then these (negative) associations should be encoded into their

CAMs and should be predictive of the PCT. In other words, the network measures capturing CAMs emotional-properties, average valence or percentage of negative nodes, should correlate with the PCT.

Regarding the second exploratory question, we are interested in the potential meaning of latent properties of individual CAMs. In the network's literature, there is little individual-level research on cognition which can inform us about whether or how the structured relationships between concepts may predict an individual's thoughts or perceptions. To our knowledge, this is the first study to empirically investigate this question. However, within the study of memory, research demonstrates an association between the significance of an event and the recollection and retention of information. For example, the intensity of an event is a "more consistent predictor of autobiographical memory properties than was valence or the age of the memory" (Talarico et al., 2004, p. 2) and the effect of intensity on memory is independent of the valence of the emotion. Furthermore, Holland and Kensinger (2010) observed that emotional arousal and personal involvement in an event have a significant impact on "the likelihood that a vivid memory can be maintained over time" (Holland & Kensinger, 2010, p. 7). In other words, individuals retain and recall more information when an event is emotionally significant. As we assume that the emotional impact of the coronavirus on people's lives is predominantly negative, we expect the information encoding during the CAM exercise to be predominantly negative, (and positively correlated with the PCT, see exploratory question 1). Following the argument that the emotional intensity of an event is a predictor of memory, a relevant question is whether the PCT will be also correlated with the density, the volume and interconnectedness of CAMs? As the valence of the network can also indicate emotional intensity, we explore this question by also conducting an additional analysis to explore whether there is a significant interaction effect between the network properties density and valence.

The interpretation of density and its relation to PCT is particularly interesting. Density, a measure of network connectivity, is an important property within the study of networks. However, applied to the study of human thought and experience the interpretation of density is not straightforward. Anecdotally people may conflate density with complexity or sophistication. However, the connectedness of a network does not necessarily demonstrate these characteristics, as networks with a fewer absolute number of nodes and links can still be considered high in density. Furthermore, in the context of drawing a CAM, a highly dense network often suggests that the outcomes of an event are not dependent on a small number of nodes (concepts) or relationships. Finally, within the computational study of networks, high density is often associated with a redundancy of information. While unnecessary for the operation of computers, in humans these redundancies may represent an effective mechanism to store and recall important information (Berntsen, 2001; Bohanek et al., 2005; Holland & Kensinger, 2010; Reisberg et al., 1988; Waters & Leeper, 1936). Consequently, in the context of the coronavirus pandemic studying the relationship between density and perception is significant to future research on human thought and experience.

Finally, predictive reliability in CAMs' network properties is important to the assessment of CAMs as a research tool. When assessing multiple covariates, caution is required when distinguishing between statistical and meaningful significant relationship as the odds of randomly finding a statistically significant effect (a false positive) increase with the number of tested variables. Important to the interpretation of results is that the same variables or families of variables are consistently retained across the modeling process (see analysis section for details on modeling process).

## Correlation between Date of Data Collection and PCT

**Table 7**

*General Linear Statistical Model. Correlation between perceived threat of coronavirus and the dates of data collection. Canadian sample*

| Variable        | Coefficient | SD    | Z     | P>z   | 95% CI          |
|-----------------|-------------|-------|-------|-------|-----------------|
| Collection Date | -0.158      | 0.182 | -0.87 | 0.386 | [-0.515, 0.199] |
| Constant        | 0.357       | 0.118 | 3.01  | 0.003 | [0.124, 0.589]  |
| N               |             |       |       |       | 93              |
| Residual df     |             |       |       |       | 91              |
| Scale P         |             |       |       |       | 0.836           |
| Residual D      |             |       |       |       | 0.836           |
| AIC             |             |       |       |       | 2.680           |

*Note.* AIC = Akaike information criterion; CI = confidence interval. Table uses robust standard errors.

**Table 8**

*General Linear Statistical Model. Correlation between perceived threat of coronavirus and the dates of data collection. German sample*

| Variable        | Coefficient | SD    | Z     | P>z   | 95% CI           |
|-----------------|-------------|-------|-------|-------|------------------|
| Collection Date | 0.032       | 0.222 | 0.14  | 0.885 | [-0.403, 0.468]  |
| constant        | -0.303      | 0.116 | -2.62 | 0.009 | [-0.529, -0.076] |
| N               |             |       |       |       | 100              |
| Residual df     |             |       |       |       | 93               |
| Scale P         |             |       |       |       | 0.9971           |
| Residual D      |             |       |       |       | 0.997            |
| AIC             |             |       |       |       | 2.855            |

*Note.* AIC = Akaike information criterion; CI = confidence interval. Table uses robust standard errors.

## Demographics

**Table 9**

*Reported Age: By Country*

| Age   | Canada      | Germany     | Total       |
|-------|-------------|-------------|-------------|
| 18-25 | 0 (0.00%)   | 1 (1.00%)   | 1 (0.52%)   |
| 26-32 | 42 (45.16%) | 56 (56.00%) | 98 (50.78%) |
| 33-39 | 27 (29.03%) | 29 (29.00%) | 56 (29.02%) |
| 40-46 | 18 (19.35%) | 12 (12.00%) | 30 (15.54%) |
| 47-53 | 2 (2.15%)   | 1 (1.00%)   | 3 (1.55%)   |
| 54-60 | 2 (2.15%)   | 1 (1.00%)   | 3 (1.55%)   |
| 61-67 | 1 (1.08%)   | 0 (0.00%)   | 1 (0.52%)   |
| 68+   | 1 (1.08%)   | 0 (0.00%)   | 1 (0.52%)   |
| Total | 93          | 100         | 193         |

**Table 10**

*Mean Reported Age Category: By Country*

| Age     | N   | M     | SD    | Min | Max |
|---------|-----|-------|-------|-----|-----|
| Canada  | 93  | 2.946 | 1.174 | 2   | 8   |
| Germany | 100 | 2.590 | 0.830 | 1   | 6   |

**Table 11**

*Reported Education: By Country*

| Education        | Canada      | Germany     | Total        |
|------------------|-------------|-------------|--------------|
| Grade School     | 0 (0.00%)   | 0 (0.00%)   | 0 (0.00%)    |
| Some High School | 3 (3.23%)   | 0 (0.00%)   | 3 (1.55%)    |
| High School      | 14 (15.04%) | 0 (0.00%)   | 14 (7.25%)   |
| Trade School     | 3 (3.23%)   | 10 (10.00%) | 13 (6.74%)   |
| Some College     | 19 (20.43%) | 10 (10.00%) | 29 (15.03%)  |
| College Degree   | 36 (38.71%) | 77 (77.00%) | 113 (58.33%) |
| Graduate School  | 14 (15.05%) | 1 (1.00%)   | 15 (7.77%)   |
| Doctorate        | 4 (4.30%)   | 2 (2.00%)   | 6 (3.11%)    |
| Total            | 93          | 100         | 193          |

**Table 12***Mean Reported Education: By Country*

| Education | N   | M     | SD    | Min | Max |
|-----------|-----|-------|-------|-----|-----|
| Canada    | 93  | 5.387 | 1.475 | 2   | 8   |
| Germany   | 100 | 5.750 | 0.730 | 4   | 8   |

**Table 13***Reported Gender: By Country*

| Gender            | Canada      | Germany     | Total        |
|-------------------|-------------|-------------|--------------|
| Female            | 41 (44.09%) | 34 (34.00%) | 75 (38.86%)  |
| Male              | 50 53.76%   | 65 (65.00%) | 115 (59.59%) |
| Non-binary        | 1 (1.08%)   | 1 (1.00%)   | 2 (1.04%)    |
| Prefer Not to Say | 1 (1.08%)   | 0 (0.00%)   | 1 (0.52%)    |
| Total             | 93          | 100         | 193          |

**Table 14***Reported Religious Importance: By Country*

| Gender                          | Canada      | Germany     | Total       |
|---------------------------------|-------------|-------------|-------------|
| Not important at all/Don't know | 35 (37.63%) | 54 (54.00%) | 89 (46.11%) |
| Not very important              | 17 (18.28%) | 22 (22.00%) | 39 (20.11%) |
| Somewhat important              | 27 (29.03%) | 20 (20.00%) | 47 (24.35%) |
| Very important                  | 14 (15.05%) | 4 (4.00%)   | 18 (9.33%)  |
| Total                           | 93          | 100         | 193         |

**Table 15***Mean Religiosity: By Country*

| Religiosity | N   | M     | SD    | Min | Max |
|-------------|-----|-------|-------|-----|-----|
| Canada      | 93  | 2.215 | 1.112 | 1   | 4   |
| Germany     | 100 | 1.740 | 0.917 | 1   | 4   |

**Table 16***Reported Ethnic Identity in the Canadian Sample*

| Ethnicity | Frequency | Percent | Cumulative |
|-----------|-----------|---------|------------|
| White     | 51        | 26.42%  | 26.42%     |
| Non-white | 142       | 73.58%  | 100.00%    |
| Total     | 93        | 100     | 100        |

**Table 17***Reported Ethnic Identity in the German Sample*

| German Birth Parents | Frequency | Percent | Cumulative |
|----------------------|-----------|---------|------------|
| Both Parents         | 76        | 76.00%  | 76.00%     |
| Mother               | 5         | 5.00%   | 81.00%     |
| Father               | 7         | 7.00%   | 88.00%     |
| Neither              | 12        | 12.00%  | 100.00%    |
| Total                | 100       | 100     | 100        |

## Measures

**Table 18**

*Perceived Threat of Coronavirus (PCT): Scores on the standardized composite measure of perceived threat of coronavirus by country*

| ZPCTScale | Canada      | Germany     | Total      |
|-----------|-------------|-------------|------------|
| -1.671    | 2 (2.15%)   | 11 (11.00%) | 13 (6.74%) |
| -1.458    | 1 (1.08%)   | 6 (6.00%)   | 7 (3.63%)  |
| -1.244    | 5 (5.38%)   | 8 (8.00%)   | 13 (6.74%) |
| -1.031    | 2 (2.15%)   | 12 (12.00%) | 14 (7.25%) |
| -.817     | 5 (5.38%)   | 5 (5.00%)   | 10 (5.18%) |
| -.604     | 5 (5.38%)   | 4 (4.00%)   | 9 (4.66%)  |
| -.390     | 7 (7.53%)   | 4 (4.00%)   | 11 (5.70%) |
| -.177     | 5 (5.38%)   | 6 (6.00%)   | 11 (5.70%) |
| .038      | 4 (4.30%)   | 11 (11.00%) | 15 (7.77%) |
| .250      | 5 (5.38%)   | 4 (4.00%)   | 9 (4.66%)  |
| .463      | 10 (10.75%) | 3 (3.00%)   | 13 (6.74%) |
| .677      | 9 (9.68%)   | 9 (9.00%)   | 18 (9.33%) |
| .890      | 11 (11.83%) | 7 (7.00%)   | 18 (9.33%) |
| 1.104     | 9 (9.68%)   | 4 (4.00%)   | 13 (6.74%) |
| 1.317     | 4 (4.30%)   | 2 (2.00%)   | 6 (3.11%)  |
| 1.531     | 3 (3.23%)   | 1 (1.00%)   | 4 (2.07%)  |
| 1.744     | 3 (3.23%)   | 2 (2.00%)   | 5 (2.59%)  |
| 1.958     | 2 (2.15%)   | 0 (0.00%)   | 2 (1.04%)  |
| 2.171     | 1 (1.08%)   | 1 (1.00%)   | 2 (1.04%)  |
| Total     | 93          | 100         | 193        |

**Table 19**

*Mean scores on standardized composite measure of the Perceived Threat of Coronavirus (PCT) by country*

| ZPCTScale | N   | M      | SD    | Min    | Max   |
|-----------|-----|--------|-------|--------|-------|
| Canada    | 93  | 0.314  | 0.912 | -1.671 | 2.171 |
| Germany   | 100 | -0.292 | 0.994 | -1.671 | 2.171 |



**Table 20***Alpha PCTQ1, PCTQ2, PCTQ3, Canadian sample*

|                               |        |
|-------------------------------|--------|
| Average interitem covariance  | 1.571  |
| Number of items in the scale  | 3      |
| Scale reliability coefficient | 0.7745 |

**Table 21***Alpha PCTQ1, PCTQ2, PCTQ3, German sample*

|                               |        |
|-------------------------------|--------|
| Average interitem covariance  | 2.127  |
| Number of items in the scale  | 3      |
| Scale reliability coefficient | 0.8835 |

**Table 22***Social Psychological Measurements of the Impact of COVID-19*

| Measure                           | Dimension                                                                    | Number of Questions |
|-----------------------------------|------------------------------------------------------------------------------|---------------------|
| Perceived Coronavirus Threat      | Experience threat of corona virus                                            | 3                   |
| Restriction Scale                 | Support for government restrictions on citizens to stop viral spread         | 2                   |
| Punishment Scale                  | Support for government to punish citizens who violated social distance rules | 2                   |
| Reactance Scale                   | Angry towards government resulting from restriction of freedoms              | 2                   |
| Research Scale                    | Support for government funded research on virus                              | 2                   |
| Stimulus Scale                    | Support for government to provide stimulus money to support individuals      | 2                   |
| News Exposure Scale               | Extent to which a participant is watching COVID related news                 | 2                   |
| Psychological Impact Scale        | Negative psychological effects of the virus                                  | 2                   |
| Financial Impact Scale            | Negative financial effects of the virus                                      | 2                   |
| Informational Contamination Scale | Distrust in information from Federal Government                              | 2                   |
| Proximity to Others Scale         | Close proximity to other diagnosed with the virus                            | 2                   |
| Personal Diagnoses Scale          | Whether they have been diagnosed or display symptoms of the virus            | 3                   |

**Table 23***Alpha scores for all additional measures*

| Measure      |                               | Canada   | Germany |
|--------------|-------------------------------|----------|---------|
| Financial    | Average interitem covariance  | 2.558    | 3.501   |
|              | Number of items in the scale  | 2        | 2       |
|              | Scale reliability coefficient | 0.766*   | 0.847** |
| Information  | Average interitem covariance  | 1.452    | 1.703   |
|              | Number of items in the scale  | 2        | 2       |
|              | Scale reliability coefficient | 0.758*   | 0.725*  |
| News         | Average interitem covariance  | 1.727    | 1.748   |
|              | Number of items in the scale  | 2        | 2       |
|              | Scale reliability coefficient | 0.740*   | 0.717*  |
| Proximity    | Average interitem covariance  | 0.354    | 0.771   |
|              | Number of items in the scale  | 2        | 2       |
|              | Scale reliability coefficient | 0.427    | 0.542   |
| Psychic      | Average interitem covariance  | 1.804    | 1.787   |
|              | Number of items in the scale  | 2        | 2       |
|              | Scale reliability coefficient | 0.743*   | 0.736*  |
| Punish       | Average interitem covariance  | 1.679    | 2.316   |
|              | Number of items in the scale  | 2        | 2       |
|              | Scale reliability coefficient | 0.802**  | 0.891** |
| Reactance    | Average interitem covariance  | 1.653    | 1.671   |
|              | Number of items in the scale  | 2        | 2       |
|              | Scale reliability coefficient | 0.902*** | 0.800** |
| Research     | Average interitem covariance  | 1.024    | 0.875   |
|              | Number of items in the scale  | 2        | 2       |
|              | Scale reliability coefficient | 0.682    | 0.605   |
| Resources    | Average interitem covariance  | 1.823    | 2.646   |
|              | Number of items in the scale  | 2        | 2       |
|              | Scale reliability coefficient | 0.791*   | 0.857** |
| Restrictions | Average interitem covariance  | 0.752    | 0.742   |
|              | Number of items in the scale  | 2        | 2       |
|              | Scale reliability coefficient | 0.656    | 0.537   |
| Stimulus     | Average interitem covariance  | 1.205    | 0.471   |
|              | Number of items in the scale  | 2        | 2       |
|              | Scale reliability coefficient | 0.755*   | 0.432   |
| Symptoms     | Average interitem covariance  | 0.581    | 0.829   |
|              | Number of items in the scale  | 3        | 3       |
|              | Scale reliability coefficient | 0.581    | 0.536   |

*Note:* All variables are standardized with a mean of 0.

\* good reliability. \*\* strong reliability. \*\*\*very strong reliability.

**Table 24***Pearson's Correlations between Perceived Threat of Coronavirus and Other Response Scales*

|              | Canada              | Germany            |
|--------------|---------------------|--------------------|
| Financial    | 0.1628<br>0.1189    | 0.1212<br>0.2296   |
| Information  | -0.0665<br>0.5266   | -0.0981<br>0.3314  |
| News         | 0.3927***<br>0.0001 | 0.2774**<br>0.0052 |
| Proximity    | 0.0052<br>0.9608    | 0.0964<br>0.3401   |
| Psychic      | 0.3483***<br>0.0006 | 0.2890**<br>0.0035 |
| Punish       | 0.2082***<br>0.0452 | 0.2969**<br>0.0027 |
| Reactance    | -0.1305<br>0.2125   | -0.1081<br>0.2845  |
| Research     | 0.2431**<br>0.0188  | 0.3167**<br>0.0013 |
| Resources    | 0.2093**<br>0.0441  | 0.1377<br>0.1719   |
| Restrictions | 0.3961***<br>0.0001 | 0.2182**<br>0.0292 |
| Stimulus     | 0.2554**<br>0.0135  | 0.055<br>0.5869    |
| Symptoms     | -0.158<br>0.1305    | 0.0026<br>0.9795   |

*Note.* All variables are standardized with a mean of 0.

\*\*  $p < 0.050$ . \*\*\*  $p < 0.001$ .

**Table 25**

*General Linear Statistical Model. Summary of all measures which show a significant correlation with the perceived threat of coronavirus. Canadian sample*

| Variable    | Coefficient | SD    | Z     | P>z       | 95% CI         |
|-------------|-------------|-------|-------|-----------|----------------|
| News        | 0.289       | 0.076 | 3.810 | 0.0001*** | [0.140, 0.437] |
| Psychic     | 0.348       | 0.078 | 4.460 | 0.0001*** | [0.195, 0.500] |
| Restriction | 0.402       | 0.059 | 6.760 | 0.0001*** | [0.285, 0.518] |
| Constant    | 0.238       | 0.074 | 3.220 | 0.001     | [0.093, 0.384] |
| N           |             |       |       |           | 93             |
| Residual df |             |       |       |           | 89             |
| Scale P     |             |       |       |           | 0.501          |
| Residual D  |             |       |       |           | 0.501          |
| AIC         |             |       |       |           | 2.189          |

*Note.* AIC = Akaike information criterion; CI = confidence interval. Table uses robust standard errors.  
\*\*\* p < 0.001.

**Table 26**

*General Linear Statistical Model. Summary of all measures which show a significant correlation with the perceived threat of coronavirus. German sample.*

| Variable    | Coef.  | Std.  | Z      | P>z     | 95% CI           |
|-------------|--------|-------|--------|---------|------------------|
| News        | 0.192  | 0.092 | 2.100  | 0.036** | [0.013, 0.372]   |
| Psych       | 0.274  | 0.108 | 2.550  | 0.011** | [0.063, 0.485]   |
| Punish      | 0.213  | 0.076 | 2.810  | 0.005** | [0.065, 0.361]   |
| Research    | 0.236  | 0.079 | 2.970  | 0.003** | [0.080, 0.392]   |
| cons        | -0.240 | 0.094 | -2.550 | 0.011   | [-0.425, -0.055] |
| N           |        |       |        |         | 100              |
| Residual df |        |       |        |         | 95               |
| Scale P     |        |       |        |         | 0.749            |
| Residual D  |        |       |        |         | 0.749            |
| AIC         |        |       |        |         | 2.597            |

*Note.* AIC = Akaike information criterion; CI = confidence interval. Table uses robust standard errors.  
\*\* p < 0.050.

**Table 27***Alpha scores for all additional scales*

| Scale                |                               | Canada  | Germany |
|----------------------|-------------------------------|---------|---------|
| Need for Affect      | Average interitem covariance  | 0.541   | 0.813   |
|                      | Number of items in the scale  | 10      | 10      |
|                      | Scale reliability coefficient | 0.794*  | 0.830** |
| Need for Structure   | Average interitem covariance  | 0.886   | 0.954   |
|                      | Number of items in the scale  | 6       | 6       |
|                      | Scale reliability coefficient | 0.840** | 0.806** |
| Cognitive Complexity | Average interitem covariance  | 1.438   | 1.504   |
|                      | Number of items in the scale  | 2       | 2       |
|                      | Scale reliability coefficient | 0.786*  | 0.750*  |
| Cognitive Simplicity | Average interitem covariance  | 0.995   | 1.016   |
|                      | Number of items in the scale  | 2       | 2       |
|                      | Scale reliability coefficient | 0.507   | 0.569   |

\* good reliability, \*\* strong reliability, \*\*\* very strong reliability.

## Network Measures

**Table 28**

*Summary of emotion-oriented network variable properties in by country*

| Variable               | N       | M      | SD    | Min    | Max   |
|------------------------|---------|--------|-------|--------|-------|
| Average Valence        |         |        |       |        |       |
| Canada                 | 93.000  | 0.103  | 1.101 | -2.392 | 2.592 |
| Germany                | 100.000 | -0.096 | 0.891 | -2.676 | 2.037 |
| PerAmb <sup>a</sup>    |         |        |       |        |       |
| Canada                 | 93.000  | -0.123 | 0.892 | -0.950 | 2.603 |
| Germany                | 100.000 | 0.115  | 1.083 | -0.950 | 3.314 |
| PerNeg <sup>b</sup>    |         |        |       |        |       |
| Canada                 | 93.000  | -0.039 | 1.082 | -2.712 | 2.795 |
| Germany                | 100.000 | 0.036  | 0.921 | -1.961 | 2.695 |
| PerNeut <sup>c</sup>   |         |        |       |        |       |
| Canada                 | 93.000  | -0.056 | 1.078 | -1.000 | 6.252 |
| Germany                | 100.000 | 0.052  | 0.924 | -1.000 | 3.144 |
| PerPos <sup>d</sup>    |         |        |       |        |       |
| Canada                 | 93.000  | 0.166  | 1.069 | -2.066 | 2.523 |
| Germany                | 100.000 | -0.154 | 0.910 | -2.066 | 1.788 |
| C-NodeVal <sup>e</sup> |         |        |       |        |       |
| Canada                 | 93.000  | -0.059 | 1.052 | -1.535 | 2.077 |
| Germany                | 100.000 | 0.055  | 0.951 | -1.535 | 2.077 |

<sup>a</sup>Percentage of ambivalent nodes. <sup>b</sup>Percentage of negative nodes. <sup>c</sup>Percentage of neutral nodes.

<sup>d</sup>Percentage of positive nodes. <sup>e</sup>Central node value.

**Table 29***Summary of latent network variable properties in by country*

| Variable        | N       | M      | SD    | Min    | Max   |
|-----------------|---------|--------|-------|--------|-------|
| Centrality      |         |        |       |        |       |
| Canada          | 93.000  | 0.249  | 1.073 | -2.475 | 2.003 |
| Germany         | 100.000 | -0.232 | 0.870 | -1.548 | 2.003 |
| Density         |         |        |       |        |       |
| Canada          | 93.000  | 0.249  | 1.073 | -2.475 | 2.003 |
| Germany         | 100.000 | -0.232 | 0.870 | -1.548 | 2.003 |
| Diameter        |         |        |       |        |       |
| Canada          | 93      | -0.135 | 1.021 | -2.430 | 2.926 |
| Germany         | 100     | 0.125  | 0.968 | -1.665 | 2.160 |
| Number Nodes    |         |        |       |        |       |
| Canada          | 93.000  | -0.199 | 0.973 | -3.654 | 2.496 |
| Germany         | 100.000 | 0.185  | 0.994 | -2.360 | 2.262 |
| Number Links    |         |        |       |        |       |
| Canada          | 93.000  | -0.200 | 0.993 | -3.290 | 1.965 |
| Germany         | 100.000 | 0.186  | 0.975 | -2.707 | 1.965 |
| Number Dashed   |         |        |       |        |       |
| Canada          | 93.000  | -0.294 | 0.921 | -1.468 | 1.752 |
| Germany         | 100.000 | 0.274  | 0.997 | -1.468 | 2.033 |
| Number Solid    |         |        |       |        |       |
| Canada          | 93.000  | -0.059 | 1.010 | -4.516 | 2.141 |
| Germany         | 100.000 | 0.055  | 0.992 | -3.274 | 2.005 |
| Triadic Closure |         |        |       |        |       |
| Canada          | 93      | -0.811 | 1.046 | -1.524 | 1.254 |
| Germany         | 100     | 0.075  | 0.954 | -1.524 | 1.138 |

**Table 30**

*Pearson's correlation between latent network measures. Combined sample. Significant correlations are marked by \*.*

|                    | Central<br>Node   | Density           | Number<br>Blocks | Number<br>Links  | Links<br>Dashed   | Links<br>Solid   | Triadic<br>Closure | Diameter |
|--------------------|-------------------|-------------------|------------------|------------------|-------------------|------------------|--------------------|----------|
| Centrality         | 1                 |                   |                  |                  |                   |                  |                    |          |
| Density            | 0.6812*<br>0.0001 | 1                 |                  |                  |                   |                  |                    |          |
| Number<br>Blocks   | -0.685*<br>0.0001 | -0.845*<br>0.0001 | 1                |                  |                   |                  |                    |          |
| Number<br>Links    | -0.527*<br>0.0001 | -0.509*<br>0.0001 | 0.878*<br>0.0001 | 1                |                   |                  |                    |          |
| Links<br>Dashed    | -0.108<br>0.1334  | -0.072<br>0.318   | 0.249*<br>0.0005 | 0.350*<br>0.0001 | 1                 |                  |                    |          |
| Links<br>Solid     | -0.494*<br>0.0001 | -0.490*<br>0.0001 | 0.770*<br>0.0001 | 0.834*<br>0.0001 | -0.118<br>0.1029  | 1                |                    |          |
| Triadic<br>Closure | 0.051<br>0.480    | 0.297*<br>0.0001  | 0.044<br>0.5398  | 0.372*<br>0.001  | 0.1515*<br>0.0367 | 0.295*<br>0.0001 | 1                  |          |
| Diameter           | -0.742<br>0.0001* | -0.600*<br>0.0001 | 0.709*<br>0.0001 | 0.604*<br>0.0001 | 0.139<br>0.0534   | 0.550*<br>0.0001 | -0.029<br>0.6892   | 1        |

*Note:* As the measures are not all normally distributed caution is required when interpreting the statistical significance of the statistics.



**Table 31**

*Pearson's correlation between latent network measures. Canadian sample. Significant correlations are marked by \**

|                    | Central<br>Node   | Density           | Number<br>Blocks | Number<br>Links  | Links<br>Dashed | Links<br>Solid   | Triadic<br>Closure | Diameter |
|--------------------|-------------------|-------------------|------------------|------------------|-----------------|------------------|--------------------|----------|
| Centrality         | 1                 |                   |                  |                  |                 |                  |                    |          |
| Density            | 0.665*<br>0.0001  | 1                 |                  |                  |                 |                  |                    |          |
| Number<br>Blocks   | -0.661*<br>0.0001 | -0.823*<br>0.0001 | 1                |                  |                 |                  |                    |          |
| Number<br>Links    | -0.525*<br>0.0001 | -0.505*<br>0.0001 | 0.872*<br>0.0001 | 1                |                 |                  |                    |          |
| Links<br>Dashed    | -0.136<br>0.195   | -0.117<br>0.264   | 0.180*<br>0.0005 | 0.188*<br>0.0001 | 1               |                  |                    |          |
| Links<br>Solid     | -0.437*<br>0.0001 | -0.437*<br>0.0001 | 0.771*<br>0.0001 | 0.883*<br>0.0001 | -0.205<br>0.049 | 1                |                    |          |
| Triadic<br>Closure | 0.055<br>0.604    | 0.299*<br>0.0001  | 0.033<br>0.5398  | 0.356*<br>0.001  | 0.007<br>0.949  | 0.316*<br>0.002  | 1                  |          |
| Diameter           | -0.792<br>0.0001* | -0.595*<br>0.0001 | 0.729*<br>0.0001 | 0.609*<br>0.0001 | 0.052<br>0.618  | 0.550*<br>0.0001 | -0.044<br>0.674    | 1        |

*Note:* As the measures are not all normally distributed caution is required when interpreting the statistical significance of the statistics.

**Table 32**

*Pearson's correlation between latent network measures. German sample. Significant correlations are marked by \**

|                    | Central<br>Node   | Density           | Number<br>Blocks | Number<br>Links  | Links<br>Dashed  | Links<br>Solid   | Triadic<br>Closure | Diameter |
|--------------------|-------------------|-------------------|------------------|------------------|------------------|------------------|--------------------|----------|
| Centrality         | 1                 |                   |                  |                  |                  |                  |                    |          |
| Density            | 0.694*<br>0.0001  | 1                 |                  |                  |                  |                  |                    |          |
| Number<br>Blocks   | -0.689*<br>0.0001 | -0.872*<br>0.0001 | 1                |                  |                  |                  |                    |          |
| Number<br>Links    | -0.485*<br>0.0001 | -0.491*<br>0.0001 | 0.861*<br>0.0001 | 1                |                  |                  |                    |          |
| Links<br>Dashed    | -0.054<br>0.591   | 0.034<br>0.741    | 0.229*<br>0.022  | 0.424*<br>0.0001 | 1                |                  |                    |          |
| Links<br>Solid     | -0.568*<br>0.0001 | -0.536*<br>0.0001 | 0.779*<br>0.0001 | 0.817*<br>0.0001 | -0.084<br>0.1029 | 1                |                    |          |
| Triadic<br>Closure | 0.095<br>0.346    | 0.324*<br>0.0001  | 0.027<br>0.793   | 0.375*<br>0.001  | 0.267*<br>0.007  | 0.268*<br>0.007  | 1                  |          |
| Diameter           | -0.680*<br>0.0001 | -0.593*<br>0.0001 | 0.680*<br>0.0001 | 0.582*<br>0.0001 | 0.158<br>0.117   | 0.546*<br>0.0001 | -0.035<br>0.731    | 1        |

*Note:* As the measures are not all normally distributed caution is required when interpreting the statistical significance of the statistics.

**Table 33**

*Pearson's correlation between emotion-oriented network measures. Combined sample.  
Significant correlations are marked by \**

|                       | AvgVal <sup>a</sup> | PerPos <sup>b</sup> | PerNeg <sup>c</sup> | PerNeut <sup>d</sup> | PerAmb <sup>e</sup> | CNodeV <sup>f</sup> |
|-----------------------|---------------------|---------------------|---------------------|----------------------|---------------------|---------------------|
| AvgVal <sup>a</sup>   | 1                   |                     |                     |                      |                     |                     |
| PerPos <sup>b</sup>   | 0.8140*<br>0.0001   | 1                   |                     |                      |                     |                     |
| PerNeg <sup>c</sup>   | -0.8324*<br>0.0001  | -0.5275*<br>0.0001  | 1                   |                      |                     |                     |
| PerNeut <sup>d</sup>  | 0.055<br>0.4477     | -0.3679*<br>0.0001  | -0.4143*<br>0.0001  | 1                    |                     |                     |
| PerAmb <sup>e</sup>   | 0.0455<br>0.5299    | -0.1826*<br>0.011   | -0.2899*<br>0.0001  | -0.1243<br>0.0851    | 1                   |                     |
| CNodeVal <sup>f</sup> | 0.2571*<br>0.0003   | 0.1896*<br>0.0083   | -0.2879*<br>0.0001  | 0.1056<br>0.144      | 0.0409<br>0.5721    | 1                   |

*Note:* As the measures are not all normally distributed caution is required when interpreting the statistical significance of the statistics.

<sup>a</sup>Average valence. <sup>b</sup>Percentage of positive nodes. <sup>c</sup>Percentage of negative nodes. <sup>d</sup>Percentage of neutral nodes. <sup>e</sup>Percentage of ambivalent nodes. <sup>f</sup>Central node value.

**Table 34***Pearson's correlation between emotion-oriented network measures. Canadian sample*

|                       | AvgVal <sup>a</sup> | PerPos <sup>b</sup> | PerNeg <sup>c</sup> | PerNeut <sup>d</sup> | PerAmb <sup>e</sup> | CNodeV <sup>f</sup> |
|-----------------------|---------------------|---------------------|---------------------|----------------------|---------------------|---------------------|
| AvgVal <sup>a</sup>   | 1                   |                     |                     |                      |                     |                     |
| PerPos <sup>b</sup>   | 0.8231*<br>0.0001   | 1                   |                     |                      |                     |                     |
| PerNeg <sup>c</sup>   | -0.8560*<br>0.0001  | -0.5596*<br>0.0001  | 1                   |                      |                     |                     |
| PerNeut <sup>d</sup>  | 0.121<br>0.2478     | -0.3219*<br>0.0017  | -0.4808*<br>0.0001  | 1                    |                     |                     |
| PerAmb <sup>e</sup>   | -0.0095<br>0.9276   | -0.2120*<br>0.0414  | -0.185<br>0.0758    | -0.1016<br>0.3323    | 1                   |                     |
| CNodeVal <sup>f</sup> | 0.3627*<br>0.0004   | 0.2127*<br>0.0406   | -0.4124*<br>0.0001  | 0.2238*<br>0.031     | 0.0669<br>0.524     | 1                   |

*Note:* As the measures are not all normally distributed caution is required when interpreting the statistical significance of the statistics.

<sup>a</sup>Average valence. <sup>b</sup>Percentage of positive nodes. <sup>c</sup>Percentage of negative nodes. <sup>d</sup>Percentage of neutral nodes. <sup>e</sup>Percentage of ambivalent nodes. <sup>f</sup>Central node value.

**Table 35***Pearson's correlation between emotion-oriented network measures. German sample*

|                       | AvgVal <sup>a</sup> | PerPos <sup>b</sup> | PerNeg <sup>c</sup> | PerNeut <sup>d</sup> | PerAmb <sup>e</sup> | CNodeV <sup>f</sup> |
|-----------------------|---------------------|---------------------|---------------------|----------------------|---------------------|---------------------|
| AvgVal <sup>a</sup>   | 1                   |                     |                     |                      |                     |                     |
| PerPos <sup>b</sup>   | 0.7988*<br>0.0001   | 1                   |                     |                      |                     |                     |
| PerNeg <sup>c</sup>   | -0.8035*<br>0.0001  | -0.4889*<br>0.0001  | 1                   |                      |                     |                     |
| PerNeut <sup>d</sup>  | -0.0201<br>0.8429   | -0.4187*<br>0.0001  | -0.3363*<br>0.0006  | 1                    |                     |                     |
| PerAmb <sup>e</sup>   | 0.1244<br>0.2177    | -0.1311<br>0.1934   | -0.4061*<br>0.0001  | -0.1627<br>0.1058    | 1                   |                     |
| CNodeVal <sup>f</sup> | 0.1406<br>0.163     | 0.1885<br>0.0604    | -0.144<br>0.153     | -0.0424<br>0.6757    | 0.0076<br>0.9399    | 1                   |

*Note:* As the measures are not all normally distributed caution is required when interpreting the statistical significance of the statistics.

<sup>a</sup>Average valence. <sup>b</sup>Percentage of positive nodes. <sup>c</sup>Percentage of negative nodes. <sup>d</sup>Percentage of neutral nodes. <sup>e</sup>Percentage of ambivalent nodes. <sup>f</sup>Central node value.

**Table 36**

*Pearson's correlation between latent structure and emotion-oriented network measures.  
Combined sample*

|                      | Dens <sup>a</sup> | NumNo <sup>b</sup> | NumLi <sup>c</sup> | Triad <sup>d</sup>  | Diam <sup>e</sup> | AvgVal <sup>f</sup> | PerPos <sup>g</sup> | PerNeg <sup>h</sup> | PerNeut <sup>i</sup> | PerAmb <sup>j</sup> |
|----------------------|-------------------|--------------------|--------------------|---------------------|-------------------|---------------------|---------------------|---------------------|----------------------|---------------------|
| Dens <sup>a</sup>    | 1.00              |                    |                    |                     |                   |                     |                     |                     |                      |                     |
| NumNo <sup>b</sup>   | -.845*<br>0.0001  | 1.00               |                    |                     |                   |                     |                     |                     |                      |                     |
| NumLi <sup>c</sup>   | -.509*<br>0.0001  | 0.878*<br>0.0001   | 1.00               |                     |                   |                     |                     |                     |                      |                     |
| Triad <sup>d</sup>   | 0.297*<br>0.0001  | 0.044<br>0.540     | 0.372*<br>0.0001   | 1.00                |                   |                     |                     |                     |                      |                     |
| Diam <sup>e</sup>    | -.600*<br>0.0001  | 0.709*<br>0.0001   | 0.604*<br>0.0001   | -.029<br>0.689      | 1.00              |                     |                     |                     |                      |                     |
| AvgVal <sup>f</sup>  | 0.028<br>0.704    | -.074<br>0.305     | -.065<br>0.369     | -<br>0.062<br>0.391 | -.062<br>0.390    | 1.00                |                     |                     |                      |                     |
| PerPos <sup>g</sup>  | 0.032<br>0.659    | -.095<br>0.189     | -.102<br>0.160     | -.063<br>0.387      | -.089<br>0.220    | 0.814*<br>0.0001    | 1.00                |                     |                      |                     |
| PerNeg <sup>h</sup>  | -.063<br>0.388    | 0.044<br>0.543     | -.002<br>0.979     | 0.031<br>0.670      | 0.048<br>0.505    | -.832*<br>0.0001    | -.528*<br>0.0001    | 1.00                |                      |                     |
| PerNeut <sup>i</sup> | 0.062<br>0.651    | -.023<br>0.753     | 0.004<br>0.958     | 0.053<br>0.469      | -.051<br>0.479    | 0.055<br>0.448      | -.368*<br>0.0001    | -.414*<br>0.0001    | 1.00                 |                     |
| PerAmb <sup>j</sup>  | -.033<br>0.651    | 0.113<br>0.118     | 0.166*<br>0.021    | 0.082<br>0.260      | 0.137<br>0.057    | 0.046<br>0.530      | -.183*<br>0.011     | -.290*<br>0.0001    | -.124<br>0.085       | 1.00                |
| CNVal <sup>k</sup>   | 0.051<br>0.480    | -0.053<br>0.461    | -0.046<br>0.528    | 0.026<br>0.722      | 0.018<br>0.808    | 0.257*<br>0.0003    | 0.190*<br>0.008     | -.288*<br>0.0001    | 0.106<br>0.144       | 0.041<br>0.572      |

*Note:* As the measures are not all normally distributed caution is required when interpreting the statistical significance of the statistics.

<sup>a</sup>Density. <sup>b</sup>Number of nodes. <sup>c</sup>Number of links. <sup>d</sup>Triadic closure. <sup>e</sup>Diameter. <sup>f</sup>Average valence. <sup>g</sup>Percentage of positive nodes. <sup>h</sup>Percentage of negative nodes. <sup>i</sup>Percentage of neutral nodes. <sup>j</sup>Percentage of ambivalent nodes. <sup>k</sup>Central node value.

**Table 37**

*Pearson's correlation between latent structure and emotion-oriented network measures.  
Canadian sample*

|                      | Dens <sup>a</sup> | NumNo <sup>b</sup> | NumLi <sup>c</sup> | Triad <sup>d</sup>  | Diam <sup>e</sup> | AvgVal <sup>f</sup> | PerPos <sup>g</sup> | PerNeg <sup>h</sup> | PerNeut <sup>i</sup> | PerAmb <sup>j</sup> |
|----------------------|-------------------|--------------------|--------------------|---------------------|-------------------|---------------------|---------------------|---------------------|----------------------|---------------------|
| Dens <sup>a</sup>    | 1.00              |                    |                    |                     |                   |                     |                     |                     |                      |                     |
| NumNo <sup>b</sup>   | -.823*<br>0.0001  | 1.00               |                    |                     |                   |                     |                     |                     |                      |                     |
| NumLi <sup>c</sup>   | -.505*<br>0.0001  | 0.887*<br>0.0001   | 1.00               |                     |                   |                     |                     |                     |                      |                     |
| Triad <sup>d</sup>   | 0.299*<br>0.004   | 0.033<br>0.751     | 0.356*<br>0.0001   | 1.00                |                   |                     |                     |                     |                      |                     |
| Diam <sup>e</sup>    | -.595*<br>0.0001  | 0.729*<br>0.0001   | 0.609*<br>0.0001   | -.044<br>0.674      | 1.00              |                     |                     |                     |                      |                     |
| AvgVal <sup>f</sup>  | 0.023<br>0.824    | -.135<br>0.196     | -.142<br>0.175     | -<br>0.170<br>0.104 | -.059<br>0.572    | 1.00                |                     |                     |                      |                     |
| PerPos <sup>g</sup>  | -.006<br>0.957    | -.124<br>0.236     | -.158<br>0.131     | -<br>.230*<br>0.026 | -.094<br>0.372    | 0.823*<br>0.0001    | 1.00                |                     |                      |                     |
| PerNeg <sup>h</sup>  | -.105<br>0.316    | 0.151<br>0.148     | 0.112<br>0.286     | 0.045<br>0.671      | 0.035<br>0.740    | -.856*<br>0.0001    | -.560*<br>0.0001    | 1.00                |                      |                     |
| PerNeut <sup>i</sup> | 0.145<br>0.167    | -.106<br>0.311     | -.056<br>0.593     | 0.096<br>0.359      | -.006<br>0.952    | 0.121<br>0.248      | -.322*<br>0.002     | -.481*<br>0.0001    | 1.00                 |                     |
| PerAmb <sup>j</sup>  | -.020<br>0.851    | 0.110<br>0.295     | 0.173<br>0.098     | 0.191<br>0.067      | 0.122<br>0.242    | 0.010<br>0.928      | -.212*<br>0.041     | -.185*<br>0.076     | -.102<br>0.332       | 1.00                |
| CNVal <sup>k</sup>   | 0.115<br>0.274    | -.098<br>0.351     | -.052<br>0.620     | 0.056<br>0.594      | 0.033<br>0.756    | 0.363*<br>0.0004    | 0.213*<br>0.041     | -.412*<br>0.0001    | 0.224<br>0.031       | 0.067<br>0.524      |

*Note:* As the measures are not all normally distributed caution is required when interpreting the statistical significance of the statistics.

<sup>a</sup>Density. <sup>b</sup>Number of nodes. <sup>c</sup>Number of links. <sup>d</sup>Triadic closure. <sup>e</sup>Diameter. <sup>f</sup>Average valence. <sup>g</sup>Percentage of positive nodes. <sup>h</sup>Percentage of negative nodes. <sup>i</sup>Percentage of neutral nodes. <sup>j</sup>Percentage of ambivalent nodes. <sup>k</sup>Central node value.

**Table 38**

*Pearson's correlation between latent structure and emotion-oriented network measures. German sample*

|                      | Dens <sup>a</sup> | NumNo <sup>b</sup> | NumLi <sup>c</sup> | Triad <sup>d</sup> | Diam <sup>e</sup> | AvgVal <sup>f</sup> | PerPos <sup>g</sup> | PerNeg <sup>h</sup> | PerNeut <sup>i</sup> | PerAmb <sup>j</sup> |
|----------------------|-------------------|--------------------|--------------------|--------------------|-------------------|---------------------|---------------------|---------------------|----------------------|---------------------|
| Dens <sup>a</sup>    | 1.00              |                    |                    |                    |                   |                     |                     |                     |                      |                     |
| NumNo <sup>b</sup>   | -.862*<br>0.0001  | 1.00               |                    |                    |                   |                     |                     |                     |                      |                     |
| NumLi <sup>c</sup>   | -.491*<br>0.0001  | 0.861*<br>0.0001   | 1.00               |                    |                   |                     |                     |                     |                      |                     |
| Triad <sup>d</sup>   | 0.324*<br>0.001   | 0.027<br>0.793     | 0.375*<br>0.0001   | 1.00               |                   |                     |                     |                     |                      |                     |
| Diam <sup>e</sup>    | -.593*<br>0.0001  | 0.680*<br>0.0001   | 0.582*<br>0.0001   | -.035<br>0.731     | 1.00              |                     |                     |                     |                      |                     |
| AvgVal <sup>f</sup>  | 0.005<br>0.964    | 0.031<br>0.757     | 0.064<br>0.529     | 0.090<br>0.374     | -.039<br>0.702    | 1.00                |                     |                     |                      |                     |
| PerPos <sup>g</sup>  | 0.030<br>0.767    | -.005<br>0.962     | 0.021<br>0.835     | 0.164<br>0.103     | -.042<br>0.681    | 0.799*<br>0.0001    | 1.00                |                     |                      |                     |
| PerNeg <sup>h</sup>  | -.006<br>0.951    | 0.084<br>0.408     | -.144<br>0.152     | -.128<br>0.204     | 0.054<br>0.593    | -.804*<br>0.0001    | -.489*<br>0.0001    | 1.00                |                      |                     |
| PerNeut <sup>i</sup> | -.013<br>0.895    | 0.043<br>0.675     | 0.048<br>0.638     | -.008<br>0.934     | -.119<br>0.237    | -.020<br>0.843      | -.419*<br>0.0001    | -.336*<br>0.0006    | 1.00                 |                     |
| PerAmb <sup>j</sup>  | -.016<br>0.877    | 0.080<br>0.431     | 0.129<br>0.203     | -.025<br>0.808     | 0.126<br>0.211    | 0.124<br>0.218      | -.131<br>0.193      | -.406*<br>0.0001    | -.163<br>0.106       | 1.00                |
| CNVal <sup>k</sup>   | 0.002<br>0.991    | -.034<br>0.740     | -.064<br>0.527     | -.017<br>0.864     | -.014<br>0.890    | 0.141<br>0.163      | 0.189<br>0.060      | -.144<br>0.153      | -.042<br>0.676       | 0.008<br>0.940      |

*Note:* As the measures are not all normally distributed caution is required when interpreting the statistical significance of the statistics.

<sup>a</sup>Density. <sup>b</sup>Number of nodes. <sup>c</sup>Number of links. <sup>d</sup>Triadic closure. <sup>e</sup>Diameter. <sup>f</sup>Average valence. <sup>g</sup>Percentage of positive nodes. <sup>h</sup>Percentage of negative nodes. <sup>i</sup>Percentage of neutral nodes. <sup>j</sup>Percentage of ambivalent nodes. <sup>k</sup>Central node value.



## Summary Tables: Stepwise Regression Model

**Table 39**

*General Linear Regression Model (GLM) with Robust Confidence Intervals. Combined sample*

| Variable              | Model 1:            | Model 2:            | Model 3:             | Model 4:             |
|-----------------------|---------------------|---------------------|----------------------|----------------------|
| AvgVal <sup>a</sup>   | -0.217**<br>(0.088) | -0.281**<br>(0.091) | -0.231**<br>(0.084)  | -0.151***<br>(0.012) |
| CNodeVal <sup>b</sup> |                     |                     |                      |                      |
| Centrality            | 0.166***<br>(0.10)  | 0.078***<br>(0.006) |                      | 0.093***<br>(0.012)  |
| Density <sup>c</sup>  | -0.174**<br>(0.058) | -0.159**<br>(0.070) |                      | -0.217***<br>(0.059) |
| Diameter              |                     |                     | -0.104†<br>(0.058)   |                      |
| Number Nodes          |                     |                     | 0.204***<br>(0.009)  |                      |
| Number Links          |                     |                     |                      |                      |
| Number Dashed         |                     |                     |                      |                      |
| Number Solid          |                     |                     |                      |                      |
| PerAmb <sup>c</sup>   |                     |                     |                      |                      |
| PerNeg <sup>d</sup>   | -0.120<br>(0.078)   | -0.165**<br>(0.078) | -0.114<br>(0.072)    |                      |
| PerNeut <sup>e</sup>  |                     |                     |                      |                      |
| PerPos <sup>f</sup>   |                     |                     |                      |                      |
| Triadic Closure       |                     |                     |                      | 0.109**<br>(0.055)   |
| Age                   |                     |                     | -0.054**<br>(0.024)  | -0.048**<br>(0.021)  |
| Education             |                     |                     | -0.017<br>(0.026)    | -0.002**<br>(0.021)  |
| Gender                |                     |                     |                      |                      |
| Female                |                     |                     | -0.360**<br>(0.135)  | -0.283<br>(0.181)    |
| Non-binary            |                     |                     | -1.084***<br>(0.272) | -1.391**<br>(0.508)  |
| Pref NotSay           |                     |                     | 1.503***<br>(0.255)  | 1.478***<br>(0.226)  |

|                  |                  |                      |                      |                      |
|------------------|------------------|----------------------|----------------------|----------------------|
| Country          |                  | -0.654***<br>(0.028) | -0.652***<br>(0.030) | -0.634***<br>(0.048) |
| NFA <sup>g</sup> |                  |                      |                      | 0.030<br>(0.099)     |
| NFS <sup>h</sup> |                  |                      |                      | 0.209***<br>(0.025)  |
| constant         | 0.000<br>(0.303) | 0.339<br>(0.014)     | 0.800<br>(0.146)     | 0.649<br>(0.351)     |
| N                | 193              | 193                  | 193                  | 193                  |
| Residual df      | 192              | 192                  | 192                  | 192                  |
| Scale parameter  | 0.987            | 0.890                | 0.855                | 0.821                |
| Residual D       | 0.967            | 0.867                | 0.810                | 0.770                |
| AIC              | 2.809            | 2.700                | 2.633                | 2.581                |

*Note.* AIC = Akaike information criterion; Residual D=Deviance adjust for degrees of freedom. In this model the Deviance and Pearson's scores are identical. Correlation between network measures and a standardized measure of the perceived threat of coronavirus in combined Canadian and German samples. Model network variables are selected on the basis of a stepwise selection process. Table uses cluster robust standard errors.

<sup>a</sup>Average valence. <sup>b</sup>Central node value. <sup>c</sup>Percentage of ambivalent nodes. <sup>d</sup>Percentage of negative nodes.

<sup>e</sup>Percentage of neutral nodes. <sup>f</sup>Percentage of positive nodes. <sup>g</sup>Need for affect. <sup>h</sup>Need for Structure.

†p < 0.100. \*\*p < 0.050. \*\*\*p < 0.001.

**Table 40***General Linear Regression Model (GLM) with Robust Confidence Intervals. Separate samples*

| Variable              | Model 1:<br>Can     | Model 1:<br>Ger    | Model 2:<br>Can      | Model 2:<br>Ger    | Model 3:<br>Can      | Model 3:<br>Ger     |
|-----------------------|---------------------|--------------------|----------------------|--------------------|----------------------|---------------------|
| AvgVal <sup>a</sup>   | -0.418**<br>(0.132) |                    | -0.399**<br>(0.139)  |                    |                      |                     |
| CNodeVal <sup>b</sup> |                     |                    |                      |                    |                      |                     |
| Centrality            | -0.151<br>(0.122)   |                    |                      |                    |                      |                     |
| Density <sub>c</sub>  |                     | 0.342†<br>(0.194)  |                      | 0.332†<br>(0.193)  |                      | 0.342†<br>(0.192)   |
| Diameter              | -0.326**<br>(0.127) |                    | -0.223†<br>(0.117)   |                    | -0.188<br>(0.119)    |                     |
| Number Nodes          | 0.649**<br>(0.225)  | 0.450**<br>(0.166) | 1.092**<br>(0.275)   | 0.444**<br>(0.177) | 0.931**<br>(0.080)   | 0.429**<br>(0.168)  |
| Number Links          | -0.490**<br>(0.225) |                    | -0.913***<br>(0.303) |                    | -0.760***<br>(0.316) |                     |
| Number Dashed         |                     |                    |                      |                    |                      |                     |
| Number Solid          |                     |                    |                      |                    |                      |                     |
| PerAmb <sup>c</sup>   |                     |                    |                      |                    |                      |                     |
| PerNeg <sup>d</sup>   | -0.292**<br>(0.123) |                    | -0.295**<br>(0.128)  |                    | -0.097<br>(0.080)    |                     |
| PerNeut <sup>e</sup>  |                     |                    |                      |                    |                      |                     |
| PerPos <sup>f</sup>   |                     |                    |                      |                    | -0.259**<br>(0.091)  |                     |
| Triadic Closure       |                     |                    | 0.211†<br>(0.116)    |                    | 0.185<br>(0.115)     |                     |
| Age                   |                     |                    | -0.111†<br>(0.067)   | -0.099<br>(0.126)  | -0.101<br>(0.063)    | -0.064<br>(0.132)   |
| Education             |                     |                    | -0.046<br>(0.060)    | 0.001<br>(0.160)   | -0.046<br>(0.059)    | 0.087<br>(0.144)    |
| Gender                |                     |                    |                      |                    |                      |                     |
| Female                |                     |                    | -0.415**<br>(0.171)  | -0.239<br>(0.219)  | -0.340**<br>(0.168)  | -0.099<br>(0.220)   |
| Non-binary            |                     |                    | -1.843***<br>(0.338) | -0.763†<br>(0.398) | -2.083***<br>(0.415) | -0.879**<br>(0.385) |
| PrefNotSay            |                     |                    | 1.821***<br>(0.343)  |                    | 1.752***<br>(0.359)  |                     |

|                  |                  |                   |                  |                  |                               |                    |
|------------------|------------------|-------------------|------------------|------------------|-------------------------------|--------------------|
| NFA <sup>g</sup> |                  |                   |                  |                  | 0.163 <sup>†</sup><br>(0.095) | -0.070<br>(0.094)  |
| NFS <sup>h</sup> |                  |                   |                  |                  | 0.160 <sup>†</sup><br>(0.091) | 0.242**<br>(0.093) |
| constant         | 0.371<br>(0.090) | -0.333<br>(0.098) | 1.165<br>(0.453) | 0.079<br>(1.063) | 1.102<br>(0.448)              | -0.593<br>(0.971)  |
| N                | 93               | 100               | 93               | 100              | 93                            | 100                |
| Residual df      | 86               | 97                | 83               | 94               | 81                            | 92                 |
| Scale parameter  | 0.754            | 0.953             | 0.671            | 0.968            | 0.654                         | 0.920              |
| Residual D       | 0.754            | 0.953             | 0.655            | 0.957            | 0.638                         | 0.910              |
| AIC              | 2.628            | 2.819             | 2.516            | 2.853            | 2.508                         | 2.820              |

*Note.* AIC = Akaike information criterion; Residual D=Deviance adjust for degrees of freedom. In this model the Deviance and Pearson's scores are identical. Correlation between network measures and a standardized measure of the perceived threat of coronavirus in combined Canadian and German samples. Model network variables are selected on the basis of a stepwise selection process. Table uses cluster robust standard errors.

<sup>a</sup>Average valence. <sup>b</sup>Central node value. <sup>c</sup>Percentage of ambivalent nodes. <sup>d</sup>Percentage of negative nodes.

<sup>e</sup>Percentage of neutral nodes. <sup>f</sup>Percentage of positive nodes. <sup>g</sup>Need for affect. <sup>h</sup>Need for Structure.

<sup>†</sup>p < 0.100. \*\*p < 0.050. \*\*\*p < 0.001.

**Full Statistics of Final Stepwise Models.  
Model 1: Zero-order Correlations**

**Table 41**

*General Linear Statistical Model: Correlation between CAM network properties and the standardized measure of the perceived threat of coronavirus. Combined Canadian and German samples*

| Variable            | Coefficient | SD    | Z      | P>z       | 95% CI           |
|---------------------|-------------|-------|--------|-----------|------------------|
| Average Valence     | -0.217      | 0.088 | -2.460 | 0.014**   | [-0.390, -0.044] |
| Density             | -0.174      | 0.058 | -3.020 | 0.003**   | [-0.288, -0.061] |
| Centrality          | 0.166       | 0.010 | 16.880 | 0.0001*** | [0.146, 0.185]   |
| Percentage Negative | -0.120      | 0.078 | -1.540 | 0.124     | [-0.273, 0.033]  |
| constant            | 0.000       | 0.303 | 0.000  | 1.000     | [-0.593, 0.593]  |
| N                   |             |       |        |           | 193              |
| Residual df         |             |       |        |           | 192              |
| Scale P             |             |       |        |           | 0.987            |
| Residual D          |             |       |        |           | 0.967            |
| AIC                 |             |       |        |           | 2.809            |

*Note.* AIC = Akaike information criterion; CI = confidence interval; Residual D = Deviance adjust for degrees of freedom. In this model the Deviance and Pearson's scores are identical. Network variables are selected on the basis of a stepwise exploratory variable selection process. Table uses cluster robust standard errors.

\*\*p < 0.050. \*\*\*p < 0.001.

**Table 42**

*General Linear Statistical Model: Correlation between CAM network properties and the standardized measure of the perceived threat of coronavirus. Combined Canadian and German samples*

| Variable            | Coefficient | SD    | Z       | P>z       | 95% CI           |
|---------------------|-------------|-------|---------|-----------|------------------|
| Average Valence     | -0.281      | 0.091 | -3.110  | 0.002**   | [-0.459, -0.104] |
| Centrality          | 0.078       | 0.006 | 13.980  | 0.0001*** | [0.067, 0.089]   |
| Density             | -0.159      | 0.070 | -2.280  | 0.023**   | [-0.295, -0.022] |
| Percentage Negative | -0.165      | 0.078 | -2.120  | 0.034**   | [-0.317, -0.012] |
| Country (Ger)       | -0.654      | 0.028 | -23.680 | 0.0001*** | [-0.708, -0.600] |
| constant            | 0.339       | 0.014 | 23.680  | 0.000     | [0.311, 0.367]   |
| N                   |             |       |         |           | 193              |
| Residual df         |             |       |         |           | 192              |
| Scale P             |             |       |         |           | 0.890            |
| Residual D          |             |       |         |           | 0.867            |
| AIC                 |             |       |         |           | 2.700            |

*Note.* AIC = Akaike information criterion; CI = confidence interval; Residual D = Deviance adjust for degrees of freedom. In this model the Deviance and Pearson's scores are identical. Network variables are selected on the basis of a stepwise exploratory variable selection process. Table uses cluster robust standard errors.

\*\*p < 0.050. \*\*\*p < 0.001.

**Table 43**

*General Linear Statistical Model: Correlation between CAM network properties and the standardized measure of the perceived threat of coronavirus in the Canadian sample*

| Variable            | Coefficient | SD    | Z      | P>z     | 95% CI           |
|---------------------|-------------|-------|--------|---------|------------------|
| Average Valence     | -0.418      | 0.132 | -3.160 | 0.002** | [-0.678, -0.158] |
| Centrality          | -0.151      | 0.122 | -1.240 | 0.215   | [-0.390, 0.088]  |
| Diameter            | -0.326      | 0.127 | -2.560 | 0.010** | [-0.575, -0.077] |
| Number Nodes        | 0.649       | 0.251 | 2.590  | 0.010** | [0.158, 1.140]   |
| Number Links        | -0.490      | 0.225 | -2.180 | 0.030** | [-0.931, -0.049] |
| Percentage Negative | -0.292      | 0.123 | -2.370 | 0.018** | [-0.534, -0.050] |
| constant            | 0.371       | 0.090 | 4.100  | 0.000   | [0.194, 0.548]   |
| N                   |             |       |        |         | 93               |
| Residual df         |             |       |        |         | 86               |
| Scale P             |             |       |        |         | 0.754            |
| Residual D          |             |       |        |         | 0.754            |
| AIC                 |             |       |        |         | 2.628            |

*Note.* AIC = Akaike information criterion; CI = confidence interval; Residual D = Deviance adjust for degrees of freedom. In this model the Deviance and Pearson's scores are identical. Network variables are selected on the basis of a stepwise exploratory variable selection process. Table uses cluster robust standard errors.

\*\*p < 0.050.

**Table 44**

*General Linear Statistical Model: Correlation between CAM network properties and the standardized measure of the perceived threat of coronavirus in the German sample.*

| Variable     | Coefficient | SD    | Z      | P>z     | 95% CI           |
|--------------|-------------|-------|--------|---------|------------------|
| Density      | 1.102       | 0.448 | 1.760  | 0.078†  | [-0.038, 0.723]  |
| Number Nodes | 1.102       | 0.448 | 2.720  | 0.007** | [0.126, 0.775]   |
| cons         | -0.333      | 0.098 | -3.400 | 0.001   | [-0.524, -0.141] |
| N            |             |       |        |         | 100              |
| Residual df  |             |       |        |         | 97               |
| Scale P      |             |       |        |         | 0.953            |
| Residual D   |             |       |        |         | 0.953            |
| AIC          |             |       |        |         | 2.819            |

*Note.* AIC = Akaike information criterion; CI = confidence interval; Residual D = Deviance adjust for degrees of freedom. In this model the Deviance and Pearson's scores are identical. Network variables are selected on the basis of a stepwise exploratory variable selection process. Table uses cluster robust standard errors.

†p < 0.100. \*\*p < 0.050.

**Table 45**

*General Linear Statistical Model. Correlation between CAM network properties and the standardized measure of the perceived threat of coronavirus. Combined Canadian and German samples*

| Variable            | Coefficient | SD    | Z       | P>z       | 95% CI           |
|---------------------|-------------|-------|---------|-----------|------------------|
| Average Valence     | -0.231      | 0.084 | -2.760  | 0.006**   | [-0.396, -0.067] |
| Diameter            | -0.104      | 0.058 | -1.790  | 0.073†    | [-0.218, 0.010]  |
| Number Nodes        | 0.204       | 0.009 | 21.680  | 0.0001*** | [0.185, 0.222]   |
| Percentage Negative | -0.114      | 0.072 | -1.590  | 0.111     | [-0.254, 0.026]  |
| Age                 | -0.054      | 0.024 | -2.280  | 0.023**   | [-0.101, -0.008] |
| Education           | -0.017      | 0.026 | -0.660  | 0.511     | [-0.067, 0.033]  |
| Gender              |             |       |         |           |                  |
| Female              | -0.360      | 0.135 | -2.650  | 0.008**   | [-0.625, -0.094] |
| Non-binary          | -1.084      | 0.272 | -3.990  | 0.0001*** | [-1.616, -0.551] |
| PrefNotSay          | 1.503       | 0.255 | 5.890   | 0.0001*** | [1.003, 2.003]   |
| Country             | -0.652      | 0.030 | -21.500 | 0.0001*** | [-0.712, -0.593] |
| constant            | 0.800       | 0.146 | 5.470   | 0.0001    | [0.513, 1.086]   |
| N                   |             |       |         |           | 193              |
| Residual df         |             |       |         |           | 192              |
| Scale P             |             |       |         |           | 0.855            |
| Residual D          |             |       |         |           | 0.810            |
| AIC                 |             |       |         |           | 2.633            |

*Note.* AIC = Akaike information criterion; CI = confidence interval; Residual D = Deviance adjust for degrees of freedom. In this model the Deviance and Pearson's scores are identical. Network variables are selected on the basis of a stepwise exploratory variable selection process. Table uses cluster robust standard errors.

†p < 0.100. \*\*p < 0.050. \*\*\*p < 0.001.



**Table 46**

*General Linear Statistical Model: Correlation between CAM network properties and the standardized measure of the perceived threat of coronavirus. Canadian sample*

| Variable            | Coefficient | SD    | Z      | P>z       | 95% CI           |
|---------------------|-------------|-------|--------|-----------|------------------|
| Average Valence     | -0.399      | 0.139 | -2.870 | 0.004**   | [-0.671, -0.127] |
| Diameter            | -0.223      | 0.117 | -1.900 | 0.057†    | [-0.453, 0.007]  |
| Number Nodes        | -0.913      | 0.303 | -3.010 | 0.0001*** | [-1.507, -0.319] |
| Number Links        | 1.092       | 0.275 | 3.970  | 0.003**   | [0.553, 1.632]   |
| Percentage Negative | -0.295      | 0.128 | -2.310 | 0.021**   | [-0.546, -0.044] |
| Triadic Closure     | 0.211       | 0.116 | 1.830  | 0.068†    | [-0.016, 0.438]  |
| Age                 | -0.111      | 0.067 | -1.650 | 0.100†    | [-0.243, 0.021]  |
| Education           | -0.046      | 0.060 | -0.780 | 0.437     | [-0.163, 0.070]  |
| Gender              |             |       |        |           |                  |
| Female              | -0.415      | 0.171 | -2.430 | 0.015**   | [-0.750, -0.080] |
| Non-binary          | -1.843      | 0.338 | -5.450 | 0.0001*** | [-2.506, -1.180] |
| PrefNotSay          | 1.821       | 0.343 | 5.310  | 0.0001*** | [1.150, 2.493]   |
| constant            | 1.165       | 0.453 | 2.570  | 0.010     | [0.277, 2.053]   |
| N                   |             |       |        |           | 93               |
| Residual df         |             |       |        |           | 83               |
| Scale P             |             |       |        |           | 0.671            |
| Residual D          |             |       |        |           | 0.655            |
| AIC                 |             |       |        |           | 2.516            |

*Note.* AIC = Akaike information criterion; CI = confidence interval; Residual D = Deviance adjust for degrees of freedom. In this model the Deviance and Pearson's scores are identical. Network variables are selected on the basis of a stepwise exploratory variable selection process. Table uses cluster robust standard errors.

†p < 0.100. \*\*p < 0.050. \*\*\*p < 0.001.

**Table 47**

*General Linear Statistical Model: Correlation between CAM network properties and the standardized measure of the perceived threat of coronavirus. German sample*

| Variable     | Coefficient | SD    | Z      | P>z     | 95% CI          |
|--------------|-------------|-------|--------|---------|-----------------|
| Density      | 0.332       | 0.193 | 1.720  | 0.085†  | [-0.046, 0.710] |
| Number Nodes | 0.444       | 0.177 | 2.520  | 0.012** | [0.098, 0.790]  |
| Age          | -0.099      | 0.126 | -0.790 | 0.431   | [-0.345, 0.147] |
| Education    | 0.001       | 0.160 | 0.010  | 0.993   | [-0.313, 0.315] |
| Gender       |             |       |        |         |                 |
| Female       | -0.239      | 0.219 | -1.090 | 0.274   | [-0.668, 0.189] |
| Non-binary   | -0.763      | 0.398 | -1.920 | 0.055†  | [-1.543, 0.017] |
| PrefNotSay   | -           | -     | -      | -       | -               |
| constant     | 0.079       | 1.063 | 0.070  | 0.941   | [-2.005, 2.162] |
| N            |             |       |        |         | 100             |
| Residual df  |             |       |        |         | 94              |
| Scale P      |             |       |        |         | 0.968           |
| Residual D   |             |       |        |         | 0.957           |
| AIC          |             |       |        |         | 2.853           |

*Note.* AIC = Akaike information criterion; CI = confidence interval; Residual D = Deviance adjust for degrees of freedom. In this model the Deviance and Pearson's scores are identical. Network variables are selected on the basis of a stepwise exploratory variable selection process. Table uses cluster robust standard errors.

†p < 0.100. \*\*p < 0.050. \*\*\*p < 0.001.

**Table 48**

*General Linear Statistical Model: Correlation between CAM network properties and the standardized measure of the perceived threat of coronavirus. Combined Canadian and German samples*

| Variable           | Coefficient | SD    | Z       | P>z       | 95% CI           |
|--------------------|-------------|-------|---------|-----------|------------------|
| Average Valence    | -0.151      | 0.012 | -12.970 | 0.0001*** | [-0.173, -0.128] |
| Centrality         | 0.093       | 0.012 | 7.650   | 0.0001*** | [0.069, 0.117]   |
| Density            | -0.217      | 0.059 | -3.700  | 0.0001*** | [-0.333, -0.102] |
| Triadic Closure    | 0.109       | 0.055 | 1.990   | 0.047**   | [0.002, 0.217]   |
| Age                | -0.048      | 0.021 | -2.340  | 0.020**   | [-0.088, -0.008] |
| Education          | -0.002      | 0.057 | -0.040  | 0.967     | [-0.114, 0.109]  |
| Gender             |             |       |         |           |                  |
| Female             | -0.283      | 0.181 | -1.570  | 0.117     | [-0.637, 0.071]  |
| Non-binary         | -1.391      | 0.508 | -2.740  | 0.006**   | [-2.387, -0.395] |
| PrefNotSay         | 1.478       | 0.226 | 6.530   | 0.0001**  | [1.035, 1.922]   |
| Country            | -0.634      | 0.048 | -13.320 | 0.0001*** | [-0.727, -0.540] |
| Need for Affect    | 0.030       | 0.099 | 0.300   | 0.761     | [-0.163, 0.223]  |
| Need for Structure | 0.209       | 0.025 | 8.500   | 0.0001*** | [0.161, 0.257]   |
| constant           | 0.649       | 0.351 | 1.850   | 0.064     | [-0.039, 1.337]  |
| N                  |             |       |         |           | 193              |
| Residual df        |             |       |         |           | 192              |
| Scale P            |             |       |         |           | 0.821            |
| Residual D         |             |       |         |           | 0.770            |
| AIC                |             |       |         |           | 2.581            |

*Note.* AIC = Akaike information criterion; CI = confidence interval; Residual D = Deviance adjust for degrees of freedom. In this model the Deviance and Pearson's scores are identical. Network variables are selected on the basis of a stepwise exploratory variable selection process. Table uses cluster robust standard errors.

\*\*p < 0.050. \*\*\*p < 0.001.

**Table 49**

*General Linear Statistical Model: Correlation between CAM network properties and the standardized measure of the perceived threat of coronavirus. Canadian sample*

| Variable            | Coefficient | SD    | Z      | P>z       | 95% CI           |
|---------------------|-------------|-------|--------|-----------|------------------|
| Diameter            | -0.188      | 0.119 | -1.580 | 0.113     | [-0.421, 0.045]  |
| Number Nodes        | -0.760      | 0.316 | 3.360  | 0.001***  | [-1.380, -0.140] |
| Number Links        | 0.931       | 0.277 | -2.400 | 0.016**   | [0.388, 1.474]   |
| Percentage Negative | -0.097      | 0.080 | -1.210 | 0.228     | [-0.255, 0.061]  |
| Percentage Positive | -0.259      | 0.091 | -2.840 | 0.004**   | [-0.437, -0.080] |
| Triadic Closure     | 0.185       | 0.115 | 1.610  | 0.108     | [-0.041, 0.410]  |
| Age                 | -0.101      | 0.063 | -1.610 | 0.108     | [-0.224, 0.022]  |
| Education           | -0.046      | 0.059 | -0.770 | 0.440     | [-0.162, 0.070]  |
| Gender              |             |       |        |           |                  |
| Female              | -0.340      | 0.168 | -2.030 | 0.043**   | [-0.668, -0.011] |
| Non-binary          | -2.083      | 0.415 | -5.020 | 0.0001*** | [-2.896, -1.269] |
| PrefNotSay          | 1.752       | 0.359 | 4.880  | 0.0001*** | [1.048, 2.455]   |
| Need for Affect     | 0.163       | 0.095 | 1.700  | 0.088†    | [-0.024, 0.349]  |
| Need for Structure  | 0.160       | 0.091 | 1.760  | 0.078†    | [-0.018, 0.337]  |
| constant            | 1.102       | 0.448 | 2.460  | 0.014     | [0.224, 1.980]   |
| N                   |             |       |        |           | 93               |
| Residual df         |             |       |        |           | 81               |
| Scale P             |             |       |        |           | 0.654            |
| Residual D          |             |       |        |           | 0.638            |
| AIC                 |             |       |        |           | 2.508            |

*Note.* AIC = Akaike information criterion; CI = confidence interval; Residual D = Deviance adjust for degrees of freedom. In this model the Deviance and Pearson's scores are identical. Network variables are selected on the basis of a stepwise exploratory variable selection process. Table uses cluster robust standard errors.

†p < 0.100. \*\*p < 0.050. \*\*\*p < 0.001.

**Table 50**

*General Linear Statistical Model: Correlation between CAM network properties and the standardized measure of the perceived threat of coronavirus. German sample*

| Variable           | Coefficient. | SD    | Z      | P>z     | 95% CI           |
|--------------------|--------------|-------|--------|---------|------------------|
| Density            | 0.342        | 0.192 | 1.780  | 0.075†  | [-0.035, 0.719]  |
| Number Nodes       | 0.429        | 0.168 | 2.550  | 0.011** | [0.100, 0.759]   |
| Age                | -0.064       | 0.132 | -0.490 | 0.627   | [-0.322, 0.194]  |
| Education          | 0.087        | 0.144 | 0.600  | 0.546   | [-0.195, 0.370]  |
| Gender             |              |       |        |         |                  |
| Female             | -0.099       | 0.220 | -0.450 | 0.654   | [-0.530, 0.332]  |
| Non-binary         | -0.879       | 0.385 | -2.280 | 0.023** | [-1.634, -0.124] |
| PrefNotSay         | -            | -     | -      | -       | -                |
| Need for Affect    | -0.070       | 0.094 | -0.740 | 0.457   | [-0.253, 0.114]  |
| Need for Structure | 0.242        | 0.093 | 2.610  | 0.009** | [0.060, 0.423]   |
| cons               | -0.593       | 0.971 | -0.610 | 0.542   | [-2.496, 1.310]  |
| N                  |              |       |        |         | 100              |
| Residual df        |              |       |        |         | 92               |
| Scale P            |              |       |        |         | 0.920            |
| Residual D         |              |       |        |         | 0.910            |
| AIC                |              |       |        |         | 2.820            |

*Note.* AIC = Akaike information criterion; CI = confidence interval; Residual D = Deviance adjust for degrees of freedom. In this model the Deviance and Pearson's scores are identical. Network variables are selected on the basis of a stepwise exploratory variable selection process. Table uses cluster robust standard errors.

†p < 0.100. \*\*p < 0.050.

## Alternative Models

**Table 51**

*General Linear Statistical Model: Correlation between CAM network properties and the standardized measure of the perceived threat of coronavirus. Alternative Model to the stepwise outcome, the network variable Average Valence is substituted for the variables percent negative and percent positive. Canadian sample*

| Variable           | Coefficient | SD    | Z      | P>z       | 95% CI           |
|--------------------|-------------|-------|--------|-----------|------------------|
| Average Valence    | -0.143      | 0.072 | -1.980 | 0.047*    | [-0.284, -0.002] |
| Diameter           | -0.160      | 0.126 | -1.270 | 0.206     | [-0.407, 0.087]  |
| Number Nodes       | 0.863       | 0.260 | 3.320  | 0.001***  | [0.353, 1.372]   |
| Number Links       | -0.719      | 0.296 | -2.430 | 0.015**   | [-1.299, -0.140] |
| Triadic Closure    | 0.208       | 0.117 | 1.780  | 0.075†    | [-0.021, 0.437]  |
| Age                | -0.075      | 0.071 | -1.050 | 0.293     | [-0.214, 0.065]  |
| Education          | -0.052      | 0.061 | -0.850 | 0.396     | [-0.172, 0.068]  |
| Gender             |             |       |        |           |                  |
| Female             | -0.438      | 0.165 | -2.650 | 0.008**   | [-0.762, -0.114] |
| Non-binary         | -1.932      | 0.367 | -5.260 | 0.0001*** | [-2.651, -1.212] |
| PrefNotSay         | 1.454       | 0.326 | 4.460  | 0.0001*** | [0.816, 2.093]   |
| Need for Affect    | 0.123       | 0.099 | 1.250  | 0.212     | [-0.070, 0.317]  |
| Need for Structure | 0.156       | 0.092 | 1.700  | 0.089†    | [-0.024, 0.336]  |
| constant           | 1.090       | 0.454 | 2.400  | 0.016     | [0.199, 1.981]   |
| N                  |             |       |        |           | 93               |
| Residual df        |             |       |        |           | 82               |
| Scale P            |             |       |        |           | 0.673            |
| Residual D         |             |       |        |           | 0.657            |
| AIC                |             |       |        |           | 2.528            |

*Note.* AIC = Akaike information criterion; CI = confidence interval; Residual D = Deviance adjust for degrees of freedom. In this model the Deviance and Pearson's scores are identical. Network variables are selected on the basis of a stepwise exploratory variable selection process. Table uses cluster robust standard errors.

†p < 0.100. \*\*p < 0.050. \*\*\*p < 0.001.

**Table 52**

*General Linear Statistical Model: Correlation between CAM network properties and the standardized measure of the perceived threat of coronavirus. Alternative Model to the stepwise outcome, the network variable Average Valence is substituted for the variables percent positive. Canadian sample*

| Variable            | Coefficient | SD    | Z      | P>z      | 95% CI           |
|---------------------|-------------|-------|--------|----------|------------------|
| Average Valence     | -0.397      | 0.138 | -2.860 | 0.004**  | [-0.668, -0.125] |
| Diameter            | -0.196      | 0.120 | -1.640 | 0.100    | [-0.431, 0.038]  |
| Number Nodes        | 0.966       | 0.274 | 3.530  | 0.000*** | [0.429, 1.503]   |
| Number Links        | -0.787      | 0.310 | -2.540 | 0.011**  | [-1.395, -0.180] |
| Percentage Negative | -0.296      | 0.131 | -2.270 | 0.023**  | [-0.553, -0.040] |
| Triadic Closure     | 0.193       | 0.116 | 1.660  | 0.097    | [-0.035, 0.420]  |
| Age                 | -0.117      | 0.067 | -1.750 | 0.080†   | [-0.247, 0.014]  |
| Education           | -0.044      | 0.060 | -0.740 | 0.462    | [-0.162, 0.074]  |
| Gender              |             |       |        |          |                  |
| Female              | -0.373      | 0.166 | -2.250 | 0.024**  | [-0.698, -0.048] |
| Non-binary          | -1.988      | 0.376 | -5.280 | 0.000*** | [-2.725, -1.250] |
| PrefNotSay          | 1.710       | 0.348 | 4.920  | 0.000*** | [1.028, 2.392]   |
| Need for Affect     | 0.133       | 0.097 | 1.360  | 0.173    | [-0.058, 0.324]  |
| Need for Structure  | 0.151       | 0.093 | 1.630  | 0.104    | [-0.031, 0.333]  |
| constant            | 1.149       | 0.455 | 2.520  | 0.012    | [0.257, 2.041]   |
| N                   |             |       |        |          | 93               |
| Residual df         |             |       |        |          | 81               |
| Scale P             |             |       |        |          | 0.656            |
| Residual D          |             |       |        |          | 0.640            |
| AIC                 |             |       |        |          | 2.510            |

*Note.* AIC = Akaike information criterion; CI = confidence interval; Residual D = Deviance adjust for degrees of freedom. In this model the Deviance and Pearson's scores are identical. Network variables are selected on the basis of a stepwise exploratory variable selection process. Table uses cluster robust standard errors.

†p < 0.100. \*\*p < 0.050. \*\*\*p < 0.001.

## Perceived Coronavirus Threat

**Table 53**

*General Linear Statistical Model. Difference in the perceived coronavirus threat between Canada and Germany*

| Variable    | Coefficient | SD    | Z     | P>z       | 95% CI           |
|-------------|-------------|-------|-------|-----------|------------------|
| Germany     | -0.606      | 0.137 | -4.43 | 0.0001*** | [-0.875, -0.338] |
| constant    | 0.314       | 0.094 | 3.33  | 0.001     | [0.129, 0.499]   |
| N           |             |       |       |           | 193              |
| Residual df |             |       |       |           | 191              |
| Scale P     |             |       |       |           | 0.912            |
| Residual D  |             |       |       |           | 0.912            |
| AIC         |             |       |       |           | 2.757            |

*Note.* AIC = Akaike information criterion; CI = confidence interval. Table uses cluster robust standard errors.

\*\*\*p < 0.001.



## Discussion Regressions

**Table 54**

*General Linear Statistical Model. Interaction between average valence of the CAM and country on the perceived threat of coronavirus.*

| Variable            | Coefficient | SD     | Z                   | P>z       | 95% CI           |
|---------------------|-------------|--------|---------------------|-----------|------------------|
| AvgVal <sup>a</sup> | -0.169      | 0.0001 | -1.34 <sup>15</sup> | 0.0001*** | [-0.169, -0.169] |
| Country             | -0.634      | 0.0001 | -3.4 <sup>14</sup>  | 0.0001*** | [-0.634, -0.634] |
| Country##AvgVal     | 0.063       | 0.0001 | 3.3 <sup>14</sup>   | 0.0001*** | [0.063, 0.063]   |
| cons                | 0.332       | 0.0001 | 2.3 <sup>14</sup>   | 0.0001    | [0.332, 0.332]   |
| N                   |             |        |                     |           | 193              |
| Residual df         |             |        |                     |           | 193              |
| Scale P             |             |        |                     |           | 0.901            |
| Residual D          |             |        |                     |           | 0.882            |
| AIC                 |             |        |                     |           | 2.712            |

*Note.* AIC = Akaike information criterion; CI = confidence interval. Table uses cluster robust standard errors.

<sup>a</sup>AvgVal = Average valence.

\*\*\*p < 0.001.

**Table 55**

*General Linear Statistical Model. Interaction between percentage of positive nodes and country on the perceived threat of coronavirus.*

| Variable            | Coefficient | SD     | Z                  | P>z       | 95% CI           |
|---------------------|-------------|--------|--------------------|-----------|------------------|
| PerPos <sup>a</sup> | -0.198      | 0.0001 | -2.2 <sup>14</sup> | 0.0001*** | [-0.198, -0.198] |
| Country             | -0.034      | 0.0001 | -2.9 <sup>14</sup> | 0.0001*** | [-0.646, -0.646] |
| Country##PerPos     | 0.151       | 0.0001 | 1.7 <sup>14</sup>  | 0.0001*** | [0.151, 0.151]   |
| constant            | 0.347       | 0.0001 | 2.0 <sup>14</sup>  | 0.0001    | [0.347, 0.347]   |
| N                   |             |        |                    |           | 193              |
| Residual df         |             |        |                    |           | 193              |
| Scale P             |             |        |                    |           | 0.899            |
| Residual D          |             |        |                    |           | 0.881            |
| AIC                 |             |        |                    |           | 2.711            |

*Note.* AIC = Akaike information criterion; CI = confidence interval. Table uses cluster robust standard errors.

<sup>a</sup>PerPos = Percentage of positive nodes.

\*\*\*p < 0.001.

**Table 56**

*General Linear Statistical Model. Interaction between percentage of ambivalent nodes and country on the perceived threat of coronavirus.*

| Variable           | Coefficient | SD     | Z                  | P>z       | 95% CI           |
|--------------------|-------------|--------|--------------------|-----------|------------------|
| PerAm <sup>a</sup> | 0.045       | 0.0001 | 2.8 <sup>14</sup>  | 0.0001*** | [0.045, 0.045]   |
| Country            | -0.616      | 0.0001 | -3.3 <sup>14</sup> | 0.0001*** | [-0.616, -0.616] |
| Country##PerAm     | -0.010      | 0.0001 | 1.62 <sup>13</sup> | 0.0001*** | [-0.010, -0.010] |
| constant           | 0.320       | 0.0001 | 2.2 <sup>14</sup>  | 0.0001    | [0.320, 0.320]   |
| N                  |             |        |                    |           | 193              |
| Residual df        |             |        |                    |           | 193              |
| Scale P            |             |        |                    |           | 0.921            |
| Residual D         |             |        |                    |           | 0.902            |
| AIC                |             |        |                    |           | 2.734            |

*Note.* AIC = Akaike information criterion; CI = confidence interval. Table uses cluster robust standard errors.

<sup>a</sup>PerAm = Percentage of ambivalent nodes.

\*\*\*p < 0.001.

**Table 57**

*General Linear Statistical Model. Interaction between central node valence and country on the perceived threat of coronavirus.*

| Variable               | Coefficient | SD     | Z                  | P>z       | 95%              |
|------------------------|-------------|--------|--------------------|-----------|------------------|
| <sup>a</sup> C-NodeVal | 0.017       | 0.0001 | 4.5 <sup>14</sup>  | 0.0001*** | [0.017, 0.017]   |
| Country                | -0.603      | 0.0001 | -3.3 <sup>14</sup> | 0.0001*** | [-0.603, -0.603] |
| Country## C-Node Val   | -0.104      | 0.0001 | 6.7 <sup>14</sup>  | 0.0001*** | [-0.104, -0.104] |
| constant               | 0.315       | 0.0001 | 2.3 <sup>14</sup>  | 0.0001    | [0.315, 0.315]   |
| N                      |             |        |                    |           | 193              |
| Residual df            |             |        |                    |           | 193              |
| Scale P                |             |        |                    |           | 0.918            |
| Residual D             |             |        |                    |           | 0.899            |
| AIC                    |             |        |                    |           | 2.732            |

*Note.* AIC = Akaike information criterion; CI = confidence interval. Table uses cluster robust standard errors.

<sup>a</sup>C-NodeVal = Central node value.

\*\*\*p < 0.001.

**Table 58**

*General Linear Statistical Model. Interaction between percentage of negative nodes and country on the perceived threat of coronavirus.*

| Variable            | Coefficient | SD     | Z                  | P>z       | 95% CI           |
|---------------------|-------------|--------|--------------------|-----------|------------------|
| PerNeg <sup>a</sup> | 0.098       | 0.0001 | 4.0 <sup>15</sup>  | 0.0001*** | [0.098, 0.098]   |
| Country             | -0.612      | 0.0001 | -3.0 <sup>14</sup> | 0.0001*** | [-0.612, -0.612] |
| Country##PerNeg     | -0.052      | 0.0001 | -1.0 <sup>15</sup> | 0.0001*** | [-0.052, -0.052] |
| constant            | 0.318       | 0.0001 | 2.1 <sup>14</sup>  | 0.0001    | [0.318, 0.318]   |
| N                   |             |        |                    |           | 193              |
| Residual df         |             |        |                    |           | 193              |
| Scale P             |             |        |                    |           | 0.916            |
| Residual D          |             |        |                    |           | 0.897            |
| AIC                 |             |        |                    |           | 2.729            |

*Note.* AIC = Akaike information criterion; CI = confidence interval. Table uses cluster robust standard errors.

<sup>a</sup>PerNeg = Percentage of negative nodes.

\*\*\*p < 0.001.

**Table 59**

*General Linear Statistical Model. Interaction between percentage of neutral nodes and country on the perceived threat of coronavirus.*

| Variable          | Coefficient | SD     | Z                  | P>z       | 95% CI           |
|-------------------|-------------|--------|--------------------|-----------|------------------|
| PerNeutr          | 0.080       | 0.0001 | 5.3 <sup>14</sup>  | 0.0001*** | [0.080, 0.080]   |
| Country           | -0.609      | 0.0001 | -3.2 <sup>14</sup> | 0.0001*** | [-0.609, -0.609] |
| Country##PerNeutr | -0.116      | 0.0001 | -4.5 <sup>14</sup> | 0.0001*** | [-0.116, -0.116] |
| constant          | 0.319       | 0.0001 | 1.42 <sup>15</sup> | 0.0001    | [0.319, 0.319]   |
| N                 |             |        |                    |           | 193              |
| Residual df       |             |        |                    |           | 193              |
| Scale P           |             |        |                    |           | 0.918            |
| Residual D        |             |        |                    |           | 0.898            |
| AIC               |             |        |                    |           | 2.731            |

*Note.* AIC = Akaike information criterion; CI = confidence interval. Table uses cluster robust standard errors.

<sup>a</sup>PerNeutr = Percentage of neutral nodes.

\*\*\*p < 0.001.

**Table 60***Skewness and kurtosis tests for normality in the emotional network measures*

| Variable              | N   | Pr Skewness | SD    | Adj Chi(2) | Prob>Chi(2) |
|-----------------------|-----|-------------|-------|------------|-------------|
| Average Valence       |     |             |       |            |             |
| Canada                | 93  | 0.726       | 0.169 | 2.07       | 0.356       |
| Germany               | 100 | 0.202       | 0.338 | 2.61       | 0.271       |
| Central Node Value    |     |             |       |            |             |
| Canada                | 93  | 0.841       | 0.042 | 4.29       | 0.117       |
| Germany               | 100 | 0.453       | 0.595 | 0.86       | 0.650       |
| Percentage Ambivalent |     |             |       |            |             |
| Canada                | 93  | 0.004       | 0.782 | 7.41       | 0.025       |
| Germany               | 100 | 0.001       | 0.675 | 9.76       | 0.008       |
| Percentage Negative   |     |             |       |            |             |
| Canada                | 93  | 0.770       | 0.731 | 0.20       | 0.903       |
| Germany               | 100 | 0.189       | 0.808 | 1.83       | 0.401       |
| Percentage Neutral    |     |             |       |            |             |
| Canada                | 93  | 0.001       | 0.001 | 62.80      | 0.001       |
| Germany               | 100 | 0.001       | 0.086 | 16.38      | 0.003       |
| Percentage Positive   |     |             |       |            |             |
| Canada                | 93  | 0.349       | 0.087 | 3.92       | 0.141       |
| Germany               | 100 | 0.330       | 0.034 | 5.31       | 0.070       |

**Table 61**

*General Linear Statistical Model. Correlation between number of nodes and the density of a network. Canadian Sample*

| Variable     | Coefficient | SD    | Z      | P>z       | 95% CI           |
|--------------|-------------|-------|--------|-----------|------------------|
| Number Nodes | -0.850      | 0.056 | -15.26 | 0.0001*** | [-0.959, -0.741] |
| constant     | -0.034      | 0.061 | -0.55  | 0.584     | [-0.154, 0.087]  |
| N            |             |       |        |           | 93               |
| Residual df  |             |       |        |           | 91               |
| Scale P      |             |       |        |           | 0.330            |
| Residual D   |             |       |        |           | 0.330            |
| AIC          |             |       |        |           | 1.750            |

*Note.* AIC = Akaike information criterion; CI = confidence interval. Table uses cluster robust standard errors.

\*\*\*p < 0.001.

**Table 62**

*General Linear Statistical Model. Correlation between number of nodes and the density of a network. German Sample*

| Variable     | Coefficient | SD    | Z      | P>z       | 95% CI           |
|--------------|-------------|-------|--------|-----------|------------------|
| Number Nodes | -0.853      | 0.054 | -15.94 | 0.0001*** | [-0.958, -0.748] |
| constant     | 0.032       | 0.054 | 0.59   | 0.554     | [-0.074, 0.138]  |
| N            |             |       |        |           | 100              |
| Residual df  |             |       |        |           | 98               |
| Scale P      |             |       |        |           | 0.252            |
| Residual D   |             |       |        |           | 0.252            |
| AIC          |             |       |        |           | 1.478            |

*Note.* AIC = Akaike information criterion; CI = confidence interval. Table uses cluster robust standard errors.

\*\*\*p < 0.001.

**Table 63**

*General Linear Statistical Model. Correlation between number of links and the density of a network. Canadian Sample*

| Variable     | Coefficient | SD    | Z     | P>z       | 95% CI           |
|--------------|-------------|-------|-------|-----------|------------------|
| Number Links | -0.511      | 0.102 | -5.02 | 0.0001*** | [-0.711, -0.311] |
| constant     | 0.033       | 0.095 | 0.35  | 0.725     | [-0.153, 0.219]  |
| N            |             |       |       |           | 93               |
| Residual df  |             |       |       |           | 91               |
| Scale P      |             |       |       |           | 0.761            |
| Residual D   |             |       |       |           | 0.761            |
| AIC          |             |       |       |           | 2.586            |

*Note.* AIC = Akaike information criterion; CI = confidence interval. Table uses cluster robust standard errors.

\*\*\*p < 0.001.

**Table 64**

*General Linear Statistical Model. Correlation between number of links and the density of a network. German Sample*

| Variable     | Coefficient | SD    | Z     | P>z       | 95% CI           |
|--------------|-------------|-------|-------|-----------|------------------|
| Number Links | -0.495      | 0.088 | -5.60 | 0.0001*** | [-0.668, -0.323] |
| constant     | -0.034      | 0.086 | -0.39 | 0.693     | [-0.203, 0.135]  |
| N            |             |       |       |           | 100              |
| Residual df  |             |       |       |           | 98               |
| Scale P      |             |       |       |           | 0.742            |
| Residual D   |             |       |       |           | 0.742            |
| AIC          |             |       |       |           | 2.559            |

*Note.* AIC = Akaike information criterion; CI = confidence interval. Table uses cluster robust standard errors.

\*\*\*p < 0.001.

**Table 65**

*General Linear Statistical Model. Interaction between density (Dens) and the valence of the central node (C-NodeV) and the percentage of positive nodes. Combined sample*

| Variable      | Coefficient | SD    | Z     | P>z       | 95% CI          |
|---------------|-------------|-------|-------|-----------|-----------------|
| Dens          | 0.053       | 0.059 | 0.90  | 0.370     | [-0.062, 0.167] |
| C-NodeV       | 0.192       | 0.030 | 6.43  | 0.0001*** | [0.133, 0.250]  |
| Dens##C-NodeV | -0.097      | 0.096 | -1.01 | 0.314     | [-0.285, 0.091] |
| constant      | 0.005       | 0.164 | 0.03  | 0.976     | [-0.317, 0.327] |
| N             |             |       |       |           | 193             |
| Residual df   |             |       |       |           | 192             |
| Scale P       |             |       |       |           | 0.970           |
| Residual D    |             |       |       |           | 0.955           |
| AIC           |             |       |       |           | 2.797           |

*Note.* AIC = Akaike information criterion; CI = confidence interval. Table uses cluster robust standard errors.

\*\*\*p < 0.001.

**Table 66**

*General Linear Statistical Model. Interaction between density (Dens) and the valence of the central node (C-NodeV) and the percentage of positive nodes. Canadian sample*

| Variable      | Coefficient | Std.  | Z     | P>z     | 95% CI           |
|---------------|-------------|-------|-------|---------|------------------|
| Dens          | -0.027      | 0.106 | -0.25 | 0.801   | [-0.233, 0.180]  |
| C-NodeV       | 0.223       | 0.114 | 1.96  | 0.050** | [-0.0001, 0.446] |
| Dens##C-NodeV | -0.020      | 0.080 | -0.25 | 0.803   | [-0.178, 0.137]  |
| cons          | 0.185       | 0.112 | 1.64  | 0.100   | [-0.036, 0.405]  |
| N             |             |       |       |         | 93               |
| Residual df   |             |       |       |         | 89               |
| Scale P       |             |       |       |         | 1.126            |
| Residual D    |             |       |       |         | 1.126            |
| AIC           |             |       |       |         | 2.999            |

*Note.* AIC = Akaike information criterion; CI = confidence interval. Table uses cluster robust standard errors.

\*\*p < 0.050.



**Table 67**

*General Linear Statistical Model. Interaction between density (Dens) and the valence of the central node (D-NodeV) and the percentage of positive nodes. German sample*

| Variable      | Coefficient | SD    | Z     | P>z     | 95% CI           |
|---------------|-------------|-------|-------|---------|------------------|
| Dens          | 0.096       | 0.104 | 0.93  | 0.353   | [-0.107, 0.299]  |
| C-NodeV       | 0.152       | 0.087 | 1.74  | 0.082†  | [-0.019, 0.324]  |
| Dens##C-NodeV | -0.218      | 0.100 | -2.18 | 0.029** | [-0.414, -0.022] |
| constant      | -0.152      | 0.926 | -1.64 | 0.102   | [-0.333, 0.030]  |
| N             |             |       |       |         | 100              |
| Residual df   |             |       |       |         | 96               |
| Scale P       |             |       |       |         | 0.785            |
| Residual D    |             |       |       |         | 0.785            |
| AIC           |             |       |       |         | 2.635            |

*Note.* AIC = Akaike information criterion; CI = confidence interval. Table uses cluster robust standard errors.

†p < 0.100. \*\*p < 0.050.

**Table 68**

*General Linear Statistical Model. Interaction between density (Dens) and the valence of the central node (C-NodeVal) and the percentage of negative nodes. Combined sample*

| Variable      | Coefficient | SD    | Z      | P>z       | 95% CI           |
|---------------|-------------|-------|--------|-----------|------------------|
| Dens          | -0.095      | 0.011 | -8.440 | 0.0001*** | [-0.117, -0.073] |
| C-NodeVal     | -0.290      | 0.156 | -1.860 | 0.063†    | [-0.596, 0.015]  |
| Dens##C-NodeV | 0.150       | 0.124 | 1.210  | 0.227     | [-0.093, 0.393]  |
| constant      | -0.008      | 0.044 | -0.170 | 0.863     | [-0.094, 0.079]  |
| N             |             |       |        |           | 193              |
| Residual df   |             |       |        |           | 192              |
| Scale P       |             |       |        |           | 0.908            |
| Residual D    |             |       |        |           | 0.894            |
| AIC           |             |       |        |           | 2.731            |

*Note.* AIC = Akaike information criterion; CI = confidence interval. Table uses cluster robust standard errors.

†p < 0.100. \*\*\*p < 0.001.

**Table 69**

*General Linear Statistical Model. Interaction between density (Dens) and the valence of the central node (C-NodeV) and the percentage of negative nodes Canadian sample*

| Variable     | Coefficient | SD    | Z      | P>z       | 95% CI           |
|--------------|-------------|-------|--------|-----------|------------------|
| Dens         | -0.080      | 0.094 | -0.860 | 0.392     | [-0.265, 0.104]  |
| C-NodeV      | -0.428      | 0.101 | -4.240 | 0.0001*** | [-0.626, -0.230] |
| Den##C-NodeV | 0.061       | 0.067 | 0.900  | 0.368     | [-0.071, 0.193]  |
| constant     | -0.060      | 0.105 | -0.570 | 0.569     | [-0.267, 0.147]  |
| N            |             |       |        |           | 93               |
| Residual df  |             |       |        |           | 89               |
| Scale P      |             |       |        |           | 0.997            |
| Residual D   |             |       |        |           | 0.997            |
| AIC          |             |       |        |           | 2.876            |

*Note.* AIC = Akaike information criterion; CI = confidence interval. Table uses cluster robust standard errors.

\*\*\*p < 0.001.

**Table 70**

*General Linear Statistical Model. Interaction between density (Dens) and the valence of the central node (C-NodeV) and the percentage of negative nodes German sample*

| Variable     | Coefficient | SD    | Z      | P>z       | 95% CI          |
|--------------|-------------|-------|--------|-----------|-----------------|
| Dens         | -0.109      | 0.108 | -1.010 | 0.312     | [-0.321, 0.102] |
| C-NodeV      | -0.097      | 0.084 | -1.150 | 0.249     | [-0.263, 0.068] |
| Den##C-NodeV | 0.329       | 0.094 | 3.490  | 0.0001*** | [0.144, 0.514]  |
| constant     | 0.030       | 0.091 | 0.330  | 0.744     | [-0.148, 0.208] |
| N            |             |       |        |           | 100             |
| Residual df  |             |       |        |           | 96              |
| Scale P      |             |       |        |           | 0.772           |
| Residual D   |             |       |        |           | 0.772           |
| AIC          |             |       |        |           | 2.618           |

*Note.* AIC = Akaike information criterion; CI = confidence interval. Table uses cluster robust standard errors.

\*\*\*p < 0.001.

**Table 71**

*General Linear Statistical Model. Correlation between the percentage of positive nodes (PerPos) and the perceived threat of coronavirus. Combined Sample*

| Variable    | Coefficient | SD    | Z       | P>z       | 95% CI           |
|-------------|-------------|-------|---------|-----------|------------------|
| PerPos      | -0.132      | 0.074 | -1.770  | 0.077†    | [-0.277, 0.014]  |
| Country     | -0.649      | 0.024 | -27.280 | 0.0001*** | [-0.695, -0.602] |
| constant    | 0.336       | 0.012 | 27.280  | 0.0001    | [0.312, 0.360]   |
| N           |             |       |         |           | 193              |
| Residual df |             |       |         |           | 193              |
| Scale P     |             |       |         |           | 0.900            |
| Residual D  |             |       |         |           | 0.891            |
| AIC         |             |       |         |           | 2.727            |

*Note.* AIC = Akaike information criterion; CI = confidence interval. Table uses cluster robust standard errors.

†p < 0.100. \*\*\*p < 0.001.

**Table 72**

*General Linear Statistical Model. Correlation between the percentage of positive nodes (PerPos) and the perceived threat of coronavirus. Canadian Sample*

| Variable    | Coefficient | SD    | Z      | P>z     | 95% CI           |
|-------------|-------------|-------|--------|---------|------------------|
| PerPos      | -0.198      | 0.084 | -2.360 | 0.018** | [-0.362, -0.034] |
| constant    | 0.347       | 0.092 | 3.770  | 0.0001  | [0.167, 0.527]   |
| N           |             |       |        |         | 93               |
| Residual df |             |       |        |         | 91               |
| Scale P     |             |       |        |         | 0.796            |
| Residual D  |             |       |        |         | 0.796            |
| AIC         |             |       |        |         | 2.631            |

*Note.* AIC = Akaike information criterion; CI = confidence interval. Table uses cluster robust standard errors.

†p < 0.100. \*\*p < 0.050.

**Table 73**

*General Linear Statistical Model. Correlation between the percentage of positive nodes (Perpos) and the perceived threat of coronavirus. German Sample*

| Variable    | Coefficient | SD    | Z      | P>z   | 95% CI           |
|-------------|-------------|-------|--------|-------|------------------|
| PerPos      | -0.047      | 0.112 | -0.420 | 0.677 | [-0.266, 0.173]  |
| constant    | -0.299      | 0.101 | -2.950 | 0.003 | [-0.498, -0.101] |
| N           |             |       |        |       | 100              |
| Residual df |             |       |        |       | 98               |
| Scale P     |             |       |        |       | 0.996            |
| Residual D  |             |       |        |       | 0.996            |
| AIC         |             |       |        |       | 2.853            |

*Note.* AIC = Akaike information criterion; CI = confidence interval. Table uses cluster robust standard errors.

**Table 74**

*General Linear Statistical Model. Correlation between the percentage of negative nodes (PerNeg) and the perceived threat of coronavirus. Combined Sample*

| Variable    | Coefficient | SD    | Z        | P>z      | 95% CI           |
|-------------|-------------|-------|----------|----------|------------------|
| PerNeg      | 0.075       | 0.026 | 2.910    | 0.004**  | [0.024, 0.125]   |
| Country     | -0.612      | 0.002 | -316.950 | 0.0001** | [-0.616, -0.608] |
| constant    | 0.317       | 0.001 | 316.950  | 0.0001   | [0.315, 0.319]   |
| N           |             |       |          |          | 193              |
| Residual df |             |       |          |          | 192              |
| Scale P     |             |       |          |          | 0.912            |
| Residual D  |             |       |          |          | 0.902            |
| AIC         |             |       |          |          | 2.740            |

*Note.* AIC = Akaike information criterion; CI = confidence interval. Table uses cluster robust standard errors.

\*\*p < 0.050.

**Table 75**

*General Linear Statistical Model. Correlation between the percentage of negative nodes (PerNeg) and the perceived threat of coronavirus. Canadian Sample*

| Variable    | Coef. | Std.  | Z     | P>z   | 95% CI          |
|-------------|-------|-------|-------|-------|-----------------|
| PerNeg      | 0.098 | 0.074 | 1.310 | 0.190 | [-0.048, 0.243] |
| constant    | 0.318 | 0.094 | 3.390 | 0.001 | [0.134, 0.502]  |
| N           |       |       |       |       | 93              |
| Residual df |       |       |       |       | 91              |
| Scale P     |       |       |       |       | 0.830           |
| Residual D  |       |       |       |       | 0.830           |
| AIC         |       |       |       |       | 2.673           |

*Note.* AIC = Akaike information criterion; CI = confidence interval. Table uses cluster robust standard errors.

**Table 76**

*General Linear Statistical Model. Correlation between the percentage of negative nodes (PerNeg) and the perceived threat of coronavirus. German Sample*

| Variable    | Coefficient | SD    | Z      | P>z   | 95% CI           |
|-------------|-------------|-------|--------|-------|------------------|
| PerNeg      | 0.045       | 0.127 | 0.360  | 0.720 | [-0.203, 0.293]  |
| constant    | -0.294      | 0.099 | -2.970 | 0.003 | [-0.488, -0.100] |
| N           |             |       |        |       | 100              |
| Residual df |             |       |        |       | 98               |
| Scale P     |             |       |        |       | 0.996            |
| Residual D  |             |       |        |       | 0.996            |
| AIC         |             |       |        |       | 2.853            |

*Note.* AIC = Akaike information criterion; CI = confidence interval. Table uses cluster robust standard errors.

**Table 77**

*General Linear Statistical Model. Correlation between the valence of the central node (C-NodeV) and average valence of the CAM. Combined Sample*

| Variable    | Coefficient | SD    | Z       | P>z      | 95% CI           |
|-------------|-------------|-------|---------|----------|------------------|
| C-NodeV     | 0.264       | 0.123 | 2.130   | 0.033**  | [0.022, 0.506]   |
| Country     | -0.228      | 0.014 | -16.290 | 0.0001** | [-0.256, -0.201] |
| constant    | 0.118       | 0.007 | 16.290  | 0.0001   | [0.104, 0.132]   |
| N           |             |       |         |          | 193              |
| Residual df |             |       |         |          | 192              |
| Scale P     |             |       |         |          | 0.931            |
| Residual D  |             |       |         |          | 0.921            |
| AIC         |             |       |         |          | 2.761            |

*Note.* AIC = Akaike information criterion; CI = confidence interval. Table uses cluster robust standard errors

\*\*p < 0.050.

**Table 78**

*General Linear Statistical Model. Correlation between the valence of the central node (C-NodeV) and average valence of the CAM. Canadian Sample*

| Variable    | Coefficient | SD    | Z     | P>z       | 95% CI          |
|-------------|-------------|-------|-------|-----------|-----------------|
| C-NodeV     | 0.380       | 0.100 | 3.790 | 0.0001*** | [0.183, 0.576]  |
| constant    | 0.125       | 0.107 | 1.170 | 0.241     | [-0.084, 0.334] |
| N           |             |       |       |           | 93              |
| Residual df |             |       |       |           | 91              |
| Scale P     |             |       |       |           | 1.065           |
| Residual D  |             |       |       |           | 1.065           |
| AIC         |             |       |       |           | 2.922           |

*Note.* AIC = Akaike information criterion; CI = confidence interval. Table uses cluster robust standard errors

\*\*\*p < 0.001.

**Table 79**

*General Linear Statistical Model. Correlation between the valence of the central node (C-NodeV) and average valence of the CAM. German Sample*

| Variable    | Coefficient | SD    | Z      | P>z   | 95% CI          |
|-------------|-------------|-------|--------|-------|-----------------|
| C-NodeV     | 0.132       | 0.101 | 1.300  | 0.193 | [-0.066, 0.330] |
| constant    | -0.103      | 0.087 | -1.180 | 0.240 | [-0.274, 0.069] |
| N           |             |       |        |       | 100             |
| Residual df |             |       |        |       | 98              |
| Scale P     |             |       |        |       | 0.785           |
| Residual D  |             |       |        |       | 0.785           |
| AIC         |             |       |        |       | 2.616           |

*Note.* AIC = Akaike information criterion; CI = confidence interval. Table uses cluster robust standard errors

## Power Analysis Tables

**Table 80**

*One-sided post-hoc power analysis based on Model 2 in the independent Canadian and German Samples.*

| Variable            | Coefficient | SD    | P>z | Required Sample | Achieved Power |
|---------------------|-------------|-------|-----|-----------------|----------------|
| <u>Canada</u>       |             |       |     | <u>N=93</u>     |                |
| Average Valence     | 0.399       | 0.139 | **  | n=35            | $\lambda=0.99$ |
| Diameter            | 0.223       | 0.117 | †   | n=120           | $\lambda=0.70$ |
| Number of Nodes     | 0.913       | 0.223 | *** | n=5             | $\lambda=0.99$ |
| Number of Links     | 1.092       | 0.275 | **  | n=8             | $\lambda=0.99$ |
| Percentage Negative | 0.295       | 0.128 | **  | n=67            | $\lambda=0.90$ |
| Triadic Closure     | 0.211       | 0.116 | †   | n=135           | $\lambda=0.67$ |
| <u>Germany</u>      |             |       |     | <u>N=100</u>    |                |
| Density             | 0.332       | 0.193 | †   | n=52            | $\lambda=0.96$ |
| Number of Nodes     | 0.444       | 0.177 | **  | n=27            | $\lambda=0.99$ |

*Note.*  $\alpha=0.05$ ,  $\lambda=0.80$ . †p < 0.100. \*\*p < 0.050. \*\*\*p < 0.001. Power analysis is reported for results that reach marginal significance or better. Power analysis was implemented through Stata.



**Table 81**

*One-sided post-hoc power analysis based on the Interaction Model for the independent Canadian and German Samples.*

| Variable                                 | Coefficient | SD    | P>z | Required Sample | Achieved Power |
|------------------------------------------|-------------|-------|-----|-----------------|----------------|
| <u>Canada</u>                            |             |       |     | <u>N=93</u>     |                |
| Number of Nodes                          | 0.823       | 0.201 | *** | <i>n</i> =6     | $\lambda=0.99$ |
| Percentage Negative                      | 0.219       | 0.110 | **  | <i>n</i> =125   | $\lambda=0.68$ |
| Number of Nodes<br># Percentage Negative | 0.269       | 0.092 | **  | <i>n</i> =81    | $\lambda=0.84$ |
| Number of Nodes<br># Central Node Value  | 0.337       | 0.088 | *** | <i>n</i> =50    | $\lambda=0.96$ |
| <u>Germany</u>                           |             |       |     | <u>N=100</u>    |                |
| Number of Nodes                          | 0.566       | 0.221 | **  | <i>n</i> =15    | $\lambda=0.99$ |
| Density # Central Node Value             | 0.793       | 0.255 | **  | <i>n</i> =6     | $\lambda=0.99$ |
| Number of Nodes<br># Central Node Value  | 0.495       | 0.229 | **  | <i>n</i> =21    | $\lambda=0.99$ |
| Triadic Closure #<br>Central Node Value  | 0.530       | 0.120 | *** | <i>n</i> =18    | $\lambda=0.99$ |

*Note.*  $\alpha=0.05$ ,  $\lambda=0.80$ . † $p < 0.100$ . \*\* $p < 0.050$ . \*\*\* $p < 0.001$ . Power analysis is reported for results that reach marginal significance or better. Power analysis was implemented through Stata.

### Central Nodes

**Table 82**

*Categorization of the CAMs' Central Nodes in Both Samples*

| Category     | Examples                                             | Frequency |         |
|--------------|------------------------------------------------------|-----------|---------|
|              |                                                      | Canada    | Germany |
| Coronavirus  | Corona; COVID; Pandemic                              | 42        | 40      |
| Quarantine   | Quarantine; Staying/Working from Home                | 17        | 3       |
| Restrictions | Restrictions; Shut/Lockdown; Less Leisure Activities | 2         | 13      |
| Isolation    | Isolation; Distancing; not Seeing friends            | 4         | 4       |
| Stress       | Stress; Mental Health; Emotional State; Fear         | 8         | 8       |
| Freetime     | More Freetime; More Time for Myself/Family           | 2         | 4       |
| Other        | e.g. Job; Political Tension...                       | 18        | 28      |

**Table 83**

*Categorization of CAM's reported by Valence in Both Samples*

| Category     | Negative<br>Canadian | Neutral<br>Canadian | Positive<br>Canadian | Negative<br>German | Neutral<br>German | Positive<br>German |
|--------------|----------------------|---------------------|----------------------|--------------------|-------------------|--------------------|
| Coronavirus  | 19<br>61.29%         | 23<br>48.94%        | 0<br>0.00%           | 11<br>32.35%       | 29<br>55.77%      | 0<br>0.00%         |
| Quarantine   | 2<br>6.45%           | 9<br>19.15%         | 6<br>40.00%          | 1<br>2.94%         | 2<br>3.85%        | 0<br>0.00%         |
| Restrictions | 2<br>6.45%           | 0<br>0.00%          | 0<br>0.00%           | 4<br>11.76%        | 7<br>13.46%       | 2<br>14.29%        |
| Isolation    | 1<br>3.32%           | 2<br>4.26%          | 1<br>6.67%           | 3<br>8.82%         | 0<br>0.00%        | 1<br>7.14%         |
| Stress       | 3<br>9.68%           | 3<br>6.38%          | 2<br>13.33%          | 4<br>11.76%        | 2<br>3.85%        | 2<br>14.29%        |
| Freetime     | 0<br>0.00%           | 2<br>4.26%          | 0<br>0.00%           | 0<br>0.00%         | 0<br>0.00%        | 4<br>28.57%        |
| Other        | 4<br>12.90%          | 8<br>17.02          | 6<br>40.00%          | 11<br>32.35%       | 12<br>23.08%      | 5<br>35.71%        |
| Total        | 31                   | 47                  | 15                   | 34                 | 52                | 14                 |

## Electronic Supplementary Material

### Instructions

Double-click the picture to open the full instructions.

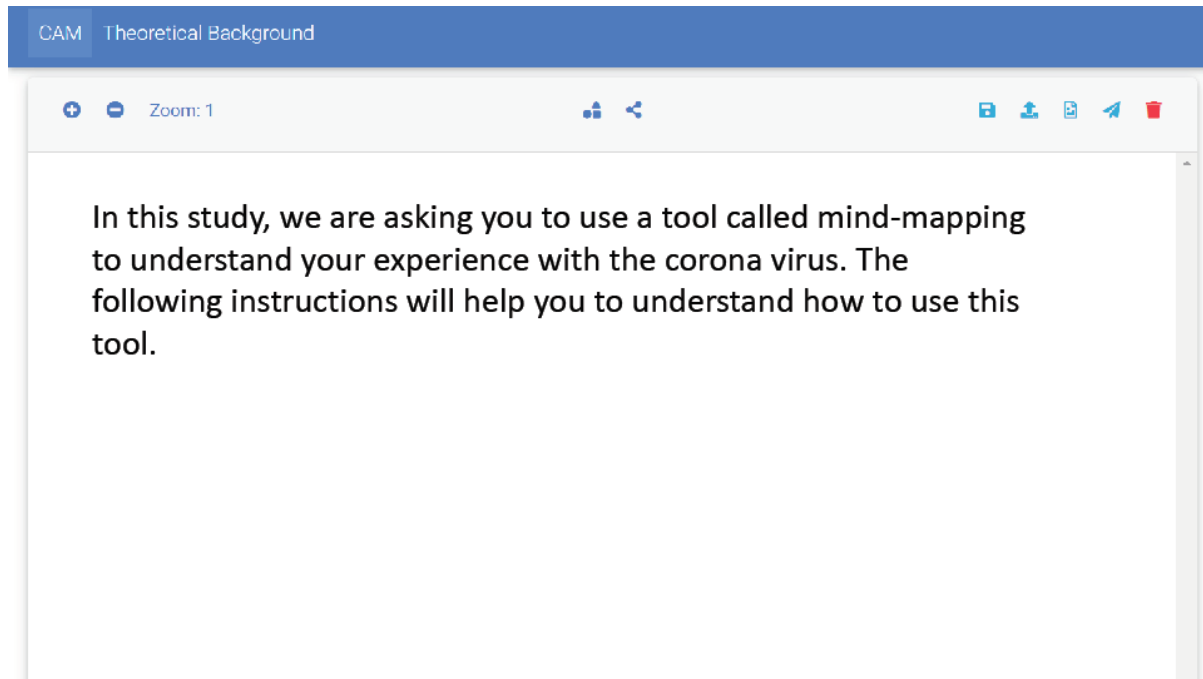

Supplement: Data_Sheet_1.PDF [file Data_Sheet_1.PDF]
